# Supplementary material
Source: PubMed Central journal article supplement (PMC5121385)

## Supplementary Material

### Text S1

#### ***Specific issues reported by the participating laboratories***

Lab-1 produced only four data points that were considered outside the usual range for bedaquiline MIC against strain H37Rv. Lab-6 reported that the OADC, used in preparing the agar media, had become contaminated. The OADC was replaced with a new batch from the same supplier. Several of the laboratories did not read the MIC results at all the timepoints specified in the protocol for the broth microdilution method (days 7, 10 and 14). Some reported day 7 results as unreliable, while Lab-1 read all the results at day 7. Lab-8 read all the results at day 14. With the exception of using day 7 results for Lab-1 and Day 14 for Lab-8, all analyses used the day 10 data.

## **Text S2**

### ***Method for bedaquiline MIC determination using 7H9 broth medium***

#### *Preparation of bedaquiline*

A 400 µg/ml working solution is made in DMSO and 2-fold serial dilutions are made from 400–1.6 µg/ml in DMSO. These working solutions are then diluted 1/100 in 7H9 medium to obtain 2X drug concentrations of 4, 2, 1, 0.5, 0.25, 0.12, 0.06, 0.03 and 0.015 µg/ml.

#### *Preparation of MTB suspension*

MTB isolates are grown on 7H11 agar medium (or Lowenstein-Jensen) and colonies resuspended in 7H9-S. The turbidity of the resulting suspension is adjusted with phosphate-buffered saline to match that of a McFarland standard 1 suspension which corresponds to  $\sim 5 \times 10^7$  CFU/ml of microorganisms. 2X inoculum is prepared using a calibrated micropipetting device by inoculating 14.7 ml of 7H9-S tube with 300 µl of the 1 McFarland suspensions

(50-fold dilution from 1 McFarland or  $1 \times 10^6$  CFU/ml).

#### *Preparation and inoculation of the microtiter plates*

A 100 µl of 2X bedaquiline working solutions is added to wells except the growth control wells which receive 100 µl 7H9-S only. Pour the 2X inoculum into a disposable inoculum reservoir. Using a 8 or 12 channel micro-pipette and sterile tips with filters, add 100 µl 2X inoculum  $1 \times 10^6$  CFU/ml in 7H9-S broth to all microtiter wells, including the growth control well, but not the negative control well, which receives 100 µl of 7H9-S broth only. At this point the final drug concentrations are 2, 1, 0.5, 0.25, 0.12, 0.06, 0.03, 0.015 and 0.008 µg/ml, and the inoculum size is  $5 \times 10^5$  CFU/ml. After inoculation, seal the plates in plastic bags and incubate at 35–37°C.

### ***Reading of the microtiter plates***

Read MICs at day 7, day 10 and day 14. No more reading should occur after day 14. For better interpretation of the results, growth must be compared to that of the growth control well.

- Microtiter plates should be read by visual inspection per local procedure.
- The MIC of each drug is interpreted as the lowest concentration of the antibiotic that prevents visual growth. For bedaquiline, the endpoint should be assessed as a completely clear well.
- Positive and negative controls: the positive control should show positive growth and the negative control should show no growth within the incubation protocol period. If the negative control shows a growth, the procedures need to be investigated for potential cross-manipulation and all reagents checked for possible source of contamination.

#### **Note:**

1. Commercial frozen microtiter plates from Thermo Fisher could be used for liquid based MIC. In this case, the product package insert should be followed for the entire DST.
2. The 7H9-S medium should be stored protected from light at 4°C.
3. It is important to have fresh growth on a solid medium (21–28 days old). Older cultures may result in unreliable susceptibility test results.
4. Drug solutions in DMSO may be frozen in aliquots at –20°C and stored for up to 3 months. Once thawed, discard the leftover and do not store or refreeze.
5. The test plate should be in polystyrene.

### ***Detection of contamination***

The incidence of contamination can vary from laboratory to laboratory depending on several factors. The recommendation is that up to 5% contamination rate is acceptable. Liquid media are more susceptible to contamination than solid media. To prevent contamination, it is extremely important to take care during the manipulation and to work with sterile material. Any well with a turbid appearance is suspected of contamination and its result is not valid.

### ***Quality control***

For bedaquiline MIC determinations, a quality control is performed by testing the MTB H37Rv strain (a susceptible strain to bedaquiline; ATCC-American Type Culture Collection - number 27294) on each new lot of 7H9 broth using the same set of concentrations used in the assay for the MTB isolates. Standard bedaquiline solutions should provide the following range of MIC values: 0.015–0.06 µg/ml.

**Table S1.** 7H10 agar dilution raw data from all laboratories for bedaquiline tested against the MTB H37Rv strain

DST, drug susceptibility test; BDQ, bedaquiline; MIC, minimal inhibitory concentration; INH, isoniazid;

| Media Lot No | Supplier         | Supplier's Lot No | DST No | Date of DST | BDQ MIC ( $\mu\text{g/mL}$ ) | INH MIC ( $\mu\text{g/mL}$ ) | Lab ID |
|--------------|------------------|-------------------|--------|-------------|------------------------------|------------------------------|--------|
| Lot 1        | Becton Dickinson | 3116410           | 1      | 4/24/2014   | 0.03                         | 0.12                         | Lab-1  |
| Lot 1        | Becton Dickinson | 3116410           | 2      | 4/25/2014   | 0.06                         | 0.12                         | Lab-1  |
| Lot 1        | Becton Dickinson | 3116410           | 3      | 4/28/2014   | 0.03                         | 0.12                         | Lab-1  |
| Lot 1        | Becton Dickinson | 3116410           | 4      | 4/29/2014   | 0.03                         | 0.12                         | Lab-1  |
| Lot 1        | Becton Dickinson | 3116410           | 5      | 5/5/2014    | 0.03                         | 0.12                         | Lab-1  |
| Lot 1        | Becton Dickinson | 3116410           | 6      | 5/6/2014    | 0.03                         | 0.12                         | Lab-1  |
| Lot 1        | Becton Dickinson | 3116410           | 7      | 5/19/2014   | 0.12                         | 0.12                         | Lab-1  |
| Lot 1        | Becton Dickinson | 3116410           | 8      | 5/21/2014   | 0.12                         | 0.12                         | Lab-1  |
| Lot 1        | Becton Dickinson | 3116410           | 9      | 5/22/2014   | 0.12                         | 0.12                         | Lab-1  |
| Lot 1        | Becton Dickinson | 3116410           | 10     | 6/4/2014    | 0.12                         | 0.12                         | Lab-1  |
| Lot 2        | Sigma Aldrich    | BCBL7582V         | 1      | 4/24/2014   | 0.03                         | 0.12                         | Lab-1  |
| Lot 2        | Sigma Aldrich    | BCBL7582V         | 2      | 4/25/2014   | 0.06                         | 0.12                         | Lab-1  |
| Lot 2        | Sigma Aldrich    | BCBL7582V         | 3      | 4/28/2014   | 0.03                         | 0.12                         | Lab-1  |
| Lot 2        | Sigma Aldrich    | BCBL7582V         | 4      | 4/29/2014   | 0.03                         | 0.06                         | Lab-1  |
| Lot 2        | Sigma Aldrich    | BCBL7582V         | 5      | 5/5/2014    | 0.03                         | 0.12                         | Lab-1  |
| Lot 2        | Sigma Aldrich    | BCBL7582V         | 6      | 5/6/2014    | 0.03                         | 0.12                         | Lab-1  |
| Lot 2        | Sigma Aldrich    | BCBL7582V         | 7      | 5/19/2014   | 0.06                         | 0.06                         | Lab-1  |

| <b>Media Lot No</b> | <b>Supplier</b>  | <b>Supplier's Lot No</b> | <b>DST No</b> | <b>Date of DST</b> | <b>BDQ MIC (µg/mL)</b> | <b>INH MIC (µg/mL)</b> | <b>Lab ID</b> |
|---------------------|------------------|--------------------------|---------------|--------------------|------------------------|------------------------|---------------|
| Lot 2               | Sigma Aldrich    | BCBL7582V                | 8             | 5/21/2014          | 0.12                   | 0.12                   | Lab-1         |
| Lot 2               | Sigma Aldrich    | BCBL7582V                | 9             | 5/22/2014          | 0.12                   | 0.12                   | Lab-1         |
| Lot 2               | Sigma Aldrich    | BCBL7582V                | 10            | 6/4/2014           | 0.06                   | 0.12                   | Lab-1         |
| Lot 3               | Titan Biotech    | M2B4KN01                 | 1             | 4/24/2014          | 0.03                   | 0.12                   | Lab-1         |
| Lot 3               | Titan Biotech    | M2B4KN01                 | 2             | 4/25/2014          | 0.06                   | 0.06                   | Lab-1         |
| Lot 3               | Titan Biotech    | M2B4KN01                 | 3             | 4/28/2014          | 0.06                   | 0.12                   | Lab-1         |
| Lot 3               | Titan Biotech    | M2B4KN01                 | 4             | 4/29/2014          | 0.06                   | 0.12                   | Lab-1         |
| Lot 3               | Titan Biotech    | M2B4KN01                 | 5             | 5/5/2014           | 0.03                   | 0.12                   | Lab-1         |
| Lot 3               | Titan Biotech    | M2B4KN01                 | 6             | 5/6/2014           | 0.03                   | 0.12                   | Lab-1         |
| Lot 3               | Titan Biotech    | M2B4KN01                 | 7             | 5/19/2014          | 0.12                   | 0.12                   | Lab-1         |
| Lot 3               | Titan Biotech    | M2B4KN01                 | 8             | 5/21/2014          | 0.12                   | 0.12                   | Lab-1         |
| Lot 3               | Titan Biotech    | M2B4KN01                 | 9             | 5/22/2014          | 0.12                   | 0.12                   | Lab-1         |
| Lot 3               | Titan Biotech    | M2B4KN01                 | 10            | 6/4/2014           | 0.06                   | 0.12                   | Lab-1         |
| Lot 1               | Becton Dickinson | 3116410                  | 1             | 3/18/2014          | 0.03                   | 0.06                   | Lab-2         |
| Lot 1               | Becton Dickinson | 3116410                  | 2             | 3/25/2014          | 0.06                   | 0.12                   | Lab-2         |
| Lot 1               | Becton Dickinson | 3116410                  | 3             | 5/19/2014          | 0.015                  | 0.12                   | Lab-2         |
| Lot 1               | Becton Dickinson | 3116410                  | 4             | 5/19/2014          | 0.03                   | 0.12                   | Lab-2         |
| Lot 1               | Becton Dickinson | 3116410                  | 5             | 5/19/2014          | 0.03                   | 0.12                   | Lab-2         |
| Lot 1               | Becton Dickinson | 3116410                  | 6             | 5/20/2014          | 0.03                   | 0.12                   | Lab-2         |

| Media Lot No | Supplier         | Supplier's Lot No | DST No | Date of DST | BDQ MIC (µg/mL) | INH MIC (µg/mL) | Lab ID |
|--------------|------------------|-------------------|--------|-------------|-----------------|-----------------|--------|
| Lot 1        | Becton Dickinson | 3116410           | 7      | 5/20/2014   | 0.03            | 0.12            | Lab-2  |
| Lot 1        | Becton Dickinson | 3116410           | 8      | 5/20/2014   | 0.03            | 0.12            | Lab-2  |
| Lot 1        | Becton Dickinson | 3116410           | 9      | 6/13/2014   | 0.03            | 0.25            | Lab-2  |
| Lot 1        | Becton Dickinson | 3116410           | 10     | 6/13/2014   | 0.06            | 0.12            | Lab-2  |
| Lot1         | Becton Dickinson | 3116410           | 11     | 6/13/2014   | 0.06            | 0.12            | Lab-2  |
| Lot 2        | Sigma Aldrich    | BCBL7582V         | 1      | 3/18/2014   | 0.03            | 0.25            | Lab-2  |
| Lot 2        | Sigma Aldrich    | BCBL7582V         | 2      | 3/25/2014   | 0.06            | >0.25           | Lab-2  |
| Lot 2        | Sigma Aldrich    | BCBL7582V         | 3      | 5/19/2014   | <=0.008         | >0.25           | Lab-2  |
| Lot 2        | Sigma Aldrich    | BCBL7582V         | 4      | 5/19/2014   | 0.03            | >0.25           | Lab-2  |
| Lot 2        | Sigma Aldrich    | BCBL7582V         | 5      | 5/19/2014   | 0.03            | >0.25           | Lab-2  |
| Lot 2        | Sigma Aldrich    | BCBL7582V         | 6      | 5/20/2014   | 0.03            | >0.25           | Lab-2  |
| Lot 2        | Sigma Aldrich    | BCBL7582V         | 7      | 5/20/2014   | 0.03            | >0.25           | Lab-2  |
| Lot 2        | Sigma Aldrich    | BCBL7582V         | 8      | 5/20/2014   | 0.03            | 0.25            | Lab-2  |
| Lot 2        | Sigma Aldrich    | BCBL7582V         | 9      | 6/13/2014   | 0.03            | >0.25           | Lab-2  |
| Lot 2        | Sigma Aldrich    | BCBL7582V         | 10     | 6/13/2014   | 0.015           | >0.25           | Lab-2  |
| Lot 2        | Sigma Aldrich    | BCBL7582V         | 11     | 6/13/2014   | 0.03            | >0.25           | Lab-2  |
| Lot 3        | Titan Biotech    | M2B4KN01          | 1      | 3/18/2014   | 0.03            | 0.12            | Lab-2  |
| Lot 3        | Titan Biotech    | M2B4KN01          | 2      | 3/25/2014   | 0.06            | 0.12            | Lab-2  |
| Lot 3        | Titan Biotech    | M2B4KN01          | 3      | 5/19/2014   | 0.015           | 0.12            | Lab-2  |

| Media Lot No | Supplier         | Supplier's Lot No | DST No | Date of DST | BDQ MIC (µg/mL) | INH MIC (µg/mL) | Lab ID |
|--------------|------------------|-------------------|--------|-------------|-----------------|-----------------|--------|
| Lot 3        | Titan Biotech    | M2B4KN01          | 4      | 5/19/2014   | 0.015           | 0.25            | Lab-2  |
| Lot 3        | Titan Biotech    | M2B4KN01          | 5      | 5/19/2014   | 0.03            | 0.12            | Lab-2  |
| Lot 3        | Titan Biotech    | M2B4KN01          | 6      | 5/20/2014   | 0.03            | 0.12            | Lab-2  |
| Lot 3        | Titan Biotech    | M2B4KN01          | 7      | 5/20/2014   | 0.03            | 0.12            | Lab-2  |
| Lot 3        | Titan Biotech    | M2B4KN01          | 8      | 5/20/2014   | 0.015           | 0.06            | Lab-2  |
| Lot 3        | Titan Biotech    | M2B4KN01          | 9      | 6/13/2014   | 0.03            | 0.25            | Lab-2  |
| Lot 3        | Titan Biotech    | M2B4KN01          | 10     | 6/13/2014   | 0.03            | 0.25            | Lab-2  |
| Lot 3        | Titan Biotech    | M2B4KN01          | 11     | 6/13/2014   | 0.03            | 0.12            | Lab-2  |
| Lot 1        | Becton Dickinson | 3116410           | 1      | 6/16/2014   | 0.06            | 0.12            | Lab-3  |
| Lot 1        | Becton Dickinson | 3116410           | 2      | 6/16/2014   | 0.06            | 0.12            | Lab-3  |
| Lot 1        | Becton Dickinson | 3116410           | 3      | 6/16/2014   | 0.06            | 0.12            | Lab-3  |
| Lot 1        | Becton Dickinson | 3116410           | 4      | 6/16/2014   | 0.06            | 0.12            | Lab-3  |
| Lot 1        | Becton Dickinson | 3116410           | 5      | 6/16/2014   | 0.06            | 0.12            | Lab-3  |
| Lot 1        | Becton Dickinson | 3116410           | 6      | 6/17/2014   | 0.06            | 0.12            | Lab-3  |
| Lot 1        | Becton Dickinson | 3116410           | 7      | 6/17/2014   | 0.06            | 0.12            | Lab-3  |
| Lot 1        | Becton Dickinson | 3116410           | 8      | 6/17/2014   | 0.06            | 0.12            | Lab-3  |
| Lot 1        | Becton Dickinson | 3116410           | 9      | 6/17/2014   | 0.06            | 0.12            | Lab-3  |
| Lot 1        | Becton Dickinson | 3116410           | 10     | 6/17/2014   | 0.06            | 0.12            | Lab-3  |
| Lot 2        | Sigma Aldrich    | BCBL7582V         | 1      | 6/30/2014   | 0.03            | 0.12            | Lab-3  |



| <b>Media Lot No</b> | <b>Supplier</b> | <b>Supplier's Lot No</b> | <b>DST No</b> | <b>Date of DST</b> | <b>BDQ MIC (µg/mL)</b> | <b>INH MIC (µg/mL)</b> | <b>Lab ID</b> |
|---------------------|-----------------|--------------------------|---------------|--------------------|------------------------|------------------------|---------------|
| Lot 2               | Sigma Aldrich   | BCBL7582V                | 2             | 6/30/2014          | 0.03                   | 0.12                   | Lab-3         |
| Lot 2               | Sigma Aldrich   | BCBL7582V                | 3             | 6/30/2014          | 0.03                   | 0.12                   | Lab-3         |
| Lot 2               | Sigma Aldrich   | BCBL7582V                | 4             | 6/30/2014          | 0.03                   | 0.12                   | Lab-3         |
| Lot 2               | Sigma Aldrich   | BCBL7582V                | 5             | 6/30/2014          | 0.03                   | 0.06                   | Lab-3         |
| Lot 2               | Sigma Aldrich   | BCBL7582V                | 6             | 7/1/2014           | 0.03                   | 0.12                   | Lab-3         |
| Lot 2               | Sigma Aldrich   | BCBL7582V                | 7             | 7/1/2014           | 0.03                   | 0.06                   | Lab-3         |
| Lot 2               | Sigma Aldrich   | BCBL7582V                | 8             | 7/1/2014           | 0.03                   | 0.12                   | Lab-3         |
| Lot 2               | Sigma Aldrich   | BCBL7582V                | 9             | 7/1/2014           | 0.03                   | 0.12                   | Lab-3         |
| Lot 2               | Sigma Aldrich   | BCBL7582V                | 10            | 7/1/2014           | 0.03                   | 0.06                   | Lab-3         |
| Lot 3               | Titan Biotech   | M2B4KN01                 | 1             | 8/19/2014          | 0.12                   | 0.12                   | Lab-3         |
| Lot 3               | Titan Biotech   | M2B4KN01                 | 2             | 8/19/2014          | 0.12                   | 0.12                   | Lab-3         |
| Lot 3               | Titan Biotech   | M2B4KN01                 | 3             | 8/19/2014          | 0.06                   | 0.12                   | Lab-3         |
| Lot 3               | Titan Biotech   | M2B4KN01                 | 4             | 8/19/2014          | 0.06                   | 0.12                   | Lab-3         |
| Lot 3               | Titan Biotech   | M2B4KN01                 | 5             | 8/19/2014          | 0.12                   | 0.12                   | Lab-3         |
| Lot 3               | Titan Biotech   | M2B4KN01                 | 6             | 8/20/2014          | 0.12                   | 0.12                   | Lab-3         |
| Lot 3               | Titan Biotech   | M2B4KN01                 | 7             | 8/20/2014          | 0.12                   | 0.12                   | Lab-3         |
| Lot 3               | Titan Biotech   | M2B4KN01                 | 8             | 8/20/2014          | 0.12                   | 0.12                   | Lab-3         |
| Lot 3               | Titan Biotech   | M2B4KN01                 | 9             | 8/20/2014          | 0.12                   | 0.12                   | Lab-3         |
| Lot 3               | Titan Biotech   | M2B4KN01                 | 10            | 8/20/2014          | 0.12                   | 0.12                   | Lab-3         |

| Media Lot No | Supplier         | Supplier's Lot No | DST No | Date of DST | BDQ MIC (µg/mL) | INH MIC (µg/mL) | Lab ID |
|--------------|------------------|-------------------|--------|-------------|-----------------|-----------------|--------|
| Lot 1        | Becton Dickinson | 3116410           | 1      | 5/28/2014   | 0.06            | 0.12            | Lab-4  |
| Lot 1        | Becton Dickinson | 3116410           | 2      | 5/28/2014   | 0.06            | 0.12            | Lab-4  |
| Lot 1        | Becton Dickinson | 3116410           | 3      | 5/28/2014   | 0.06            | 0.12            | Lab-4  |
| Lot 1        | Becton Dickinson | 3116410           | 4      | 5/28/2014   | 0.06            | 0.12            | Lab-4  |
| Lot 1        | Becton Dickinson | 3116410           | 5      | 5/28/2014   | 0.06            | 0.12            | Lab-4  |
| Lot 1        | Becton Dickinson | 3116410           | 6      | 5/28/2014   | 0.06            | 0.12            | Lab-4  |
| Lot 1        | Becton Dickinson | 3116410           | 7      | 5/28/2014   | 0.06            | 0.12            | Lab-4  |
| Lot 1        | Becton Dickinson | 3116410           | 8      | 5/28/2014   | 0.06            | 0.12            | Lab-4  |
| Lot 1        | Becton Dickinson | 3116410           | 9      | 5/28/2014   | 0.06            | 0.12            | Lab-4  |
| Lot 1        | Becton Dickinson | 3116410           | 10     | 5/28/2014   | 0.06            | 0.12            | Lab-4  |
| Lot 2        | Sigma Aldrich    | BCBL7582V         | 1      | 9/11/2014   | 0.06            | >0.12           | Lab-4  |
| Lot 2        | Sigma Aldrich    | BCBL7582V         | 2      | 9/11/2014   | 0.06            | >0.12           | Lab-4  |
| Lot 2        | Sigma Aldrich    | BCBL7582V         | 3      | 9/11/2014   | 0.06            | >0.12           | Lab-4  |
| Lot 2        | Sigma Aldrich    | BCBL7582V         | 4      | 9/11/2014   | 0.06            | >0.12           | Lab-4  |
| Lot 2        | Sigma Aldrich    | BCBL7582V         | 5      | 9/11/2014   | 0.06            | >0.12           | Lab-4  |
| Lot 2        | Sigma Aldrich    | BCBL7582V         | 6      | 9/11/2014   | 0.06            | >0.12           | Lab-4  |
| Lot 2        | Sigma Aldrich    | BCBL7582V         | 7      | 9/11/2014   | 0.06            | >0.12           | Lab-4  |
| Lot 2        | Sigma Aldrich    | BCBL7582V         | 8      | 9/11/2014   | 0.06            | >0.12           | Lab-4  |
| Lot 2        | Sigma Aldrich    | BCBL7582V         | 9      | 9/11/2014   | 0.06            | >0.12           | Lab-4  |

| Media Lot No | Supplier         | Supplier's Lot No | DST No | Date of DST | BDQ MIC (µg/mL) | INH MIC (µg/mL) | Lab ID |
|--------------|------------------|-------------------|--------|-------------|-----------------|-----------------|--------|
| Lot 2        | Sigma Aldrich    | BCBL7582V         | 10     | 9/11/2014   | 0.06            | >0.12           | Lab-4  |
| Lot 3        | Titan Biotech    | M2B4KN01          | 1      | 8/28/2014   | 0.06            | 0.12            | Lab-4  |
| Lot 3        | Titan Biotech    | M2B4KN01          | 2      | 8/28/2014   | 0.06            | 0.12            | Lab-4  |
| Lot 3        | Titan Biotech    | M2B4KN01          | 3      | 8/28/2014   | 0.06            | 0.12            | Lab-4  |
| Lot 3        | Titan Biotech    | M2B4KN01          | 4      | 8/28/2014   | 0.06            | 0.12            | Lab-4  |
| Lot 3        | Titan Biotech    | M2B4KN01          | 5      | 8/28/2014   | 0.06            | 0.12            | Lab-4  |
| Lot 3        | Titan Biotech    | M2B4KN01          | 6      | 8/28/2014   | 0.06            | 0.12            | Lab-4  |
| Lot 3        | Titan Biotech    | M2B4KN01          | 7      | 8/28/2014   | 0.06            | 0.12            | Lab-4  |
| Lot 3        | Titan Biotech    | M2B4KN01          | 8      | 8/28/2014   | 0.06            | 0.12            | Lab-4  |
| Lot 3        | Titan Biotech    | M2B4KN01          | 9      | 8/28/2014   | 0.06            | 0.12            | Lab-4  |
| Lot 3        | Titan Biotech    | M2B4KN01          | 10     | 8/28/2014   | 0.06            | 0.12            | Lab-4  |
| Lot 1        | Becton Dickinson | 3116410           | 1      | 9/12/2014   | 0.25            | 0.12            | Lab-5  |
| Lot 1        | Becton Dickinson | 3116410           | 2      | 9/12/2014   | 0.25            | 0.12            | Lab-5  |
| Lot 1        | Becton Dickinson | 3116410           | 3      | 9/12/2014   | 0.25            | 0.12            | Lab-5  |
| Lot 1        | Becton Dickinson | 3116410           | 4      | 9/12/2014   | 0.12            | 0.12            | Lab-5  |
| Lot 1        | Becton Dickinson | 3116410           | 5      | 9/12/2014   | 0.25            | 0.12            | Lab-5  |
| Lot 1        | Becton Dickinson | 3116410           | 6      | 9/12/2014   | 0.25            | 0.12            | Lab-5  |
| Lot 1        | Becton Dickinson | 3116410           | 7      | 9/12/2014   | 0.25            | 0.12            | Lab-5  |
| Lot 1        | Becton Dickinson | 3116410           | 8      | 9/12/2014   | 0.25            | 0.12            | Lab-5  |

| Media Lot No | Supplier         | Supplier's Lot No | DST No | Date of DST | BDQ MIC (µg/mL) | INH MIC (µg/mL) | Lab ID |
|--------------|------------------|-------------------|--------|-------------|-----------------|-----------------|--------|
| Lot 1        | Becton Dickinson | 3116410           | 9      | 9/12/2014   | 0.25            | 0.12            | Lab-5  |
| Lot 1        | Becton Dickinson | 3116410           | 10     | 9/12/2014   | 0.25            | 0.12            | Lab-5  |
| Lot 2        | Sigma Aldrich    | BCBL7582V         | 1      | 8/4/2014    | 0.015           | >0.12           | Lab-5  |
| Lot 2        | Sigma Aldrich    | BCBL7582V         | 2      | 8/4/2014    | 0.015           | >0.12           | Lab-5  |
| Lot 2        | Sigma Aldrich    | BCBL7582V         | 3      | 8/4/2014    | 0.008           | >0.12           | Lab-5  |
| Lot 2        | Sigma Aldrich    | BCBL7582V         | 4      | 8/4/2014    | 0.03            | >0.12           | Lab-5  |
| Lot 2        | Sigma Aldrich    | BCBL7582V         | 5      | 8/4/2014    | 0.03            | >0.12           | Lab-5  |
| Lot 2        | Sigma Aldrich    | BCBL7582V         | 6      | 8/4/2014    | 0.03            | >0.12           | Lab-5  |
| Lot 2        | Sigma Aldrich    | BCBL7582V         | 7      | 8/4/2014    | 0.03            | >0.12           | Lab-5  |
| Lot 2        | Sigma Aldrich    | BCBL7582V         | 8      | 8/4/2014    | 0.06            | >0.12           | Lab-5  |
| Lot 2        | Sigma Aldrich    | BCBL7582V         | 9      | 8/4/2014    | 0.03            | >0.12           | Lab-5  |
| Lot 2        | Sigma Aldrich    | BCBL7582V         | 10     | 8/4/2014    | 0.03            | >0.12           | Lab-5  |
| Lot 3        | Titan Biotech    | M2B4KN01          | 1      | 8/7/2014    | 0.008           | >0.12           | Lab-5  |
| Lot 3        | Titan Biotech    | M2B4KN01          | 2      | 8/7/2014    | 0.015           | >0.12           | Lab-5  |
| Lot 3        | Titan Biotech    | M2B4KN01          | 3      | 8/7/2014    | 0.015           | >0.12           | Lab-5  |
| Lot 3        | Titan Biotech    | M2B4KN01          | 4      | 8/7/2014    | 0.015           | >0.12           | Lab-5  |
| Lot 3        | Titan Biotech    | M2B4KN01          | 5      | 8/7/2014    | 0.015           | >0.12           | Lab-5  |
| Lot 3        | Titan Biotech    | M2B4KN01          | 6      | 8/7/2014    | 0.015           | >0.12           | Lab-5  |
| Lot 3        | Titan Biotech    | M2B4KN01          | 7      | 8/7/2014    | 0.008           | >0.12           | Lab-5  |

| Media Lot No | Supplier         | Supplier's Lot No | DST No | Date of DST | BDQ MIC (µg/mL) | INH MIC (µg/mL) | Lab ID |
|--------------|------------------|-------------------|--------|-------------|-----------------|-----------------|--------|
| Lot 3        | Titan Biotech    | M2B4KN01          | 8      | 8/7/2014    | 0.008           | >0.12           | Lab-5  |
| Lot 3        | Titan Biotech    | M2B4KN01          | 9      | 8/7/2014    | 0.015           | >0.12           | Lab-5  |
| Lot 3        | Titan Biotech    | M2B4KN01          | 10     | 8/7/2014    | 0.015           | >0.12           | Lab-5  |
| Lot 1        | Becton Dickinson | 3116410           | 1      | 7/9/2014    | 0.03            | 0.12            | Lab-6  |
| Lot 1        | Becton Dickinson | 3116410           | 2      | 7/10/2014   | 0.03            | 0.12            | Lab-6  |
| Lot 1        | Becton Dickinson | 3116410           | 3      | 7/11/2014   | 0.03            | 0.12            | Lab-6  |
| Lot 1        | Becton Dickinson | 3116410           | 4      | 7/12/2014   | 0.03            | 0.12            | Lab-6  |
| Lot 1        | Becton Dickinson | 3116410           | 5      | 7/14/2014   | 0.03            | 0.12            | Lab-6  |
| Lot 1        | Becton Dickinson | 3116410           | 6      | 7/15/2014   | 0.03            | 0.12            | Lab-6  |
| Lot 1        | Becton Dickinson | 3116410           | 7      | 7/16/2014   | 0.03            | 0.12            | Lab-6  |
| Lot 1        | Becton Dickinson | 3116410           | 8      | 7/17/2014   | 0.03            | 0.12            | Lab-6  |
| Lot 1        | Becton Dickinson | 3116410           | 9      | 7/18/2014   | 0.03            | 0.12            | Lab-6  |
| Lot 1        | Becton Dickinson | 3116410           | 10     | 7/19/2014   | 0.03            | 0.12            | Lab-6  |
| Lot 2        | Sigma Aldrich    | BCBL7582V         | 1      | 7/21/2014   | 0.03            | > 0.12          | Lab-6  |
| Lot 2        | Sigma Aldrich    | BCBL7582V         | 2      | 7/22/2014   | 0.03            | > 0.12          | Lab-6  |
| Lot 2        | Sigma Aldrich    | BCBL7582V         | 3      | 7/23/2014   | 0.015           | > 0.12          | Lab-6  |
| Lot 2        | Sigma Aldrich    | BCBL7582V         | 4      | 7/24/2014   | ≤ 0.008         | > 0.12          | Lab-6  |
| Lot 2        | Sigma Aldrich    | BCBL7582V         | 5      | 7/24/2014   | ≤ 0.008         | > 0.12          | Lab-6  |
| Lot 2        | Sigma Aldrich    | BCBL7582V         | 6      | 7/28/2014   | ≤ 0.008         | > 0.12          | Lab-6  |

| Media Lot No | Supplier         | Supplier's Lot No | DST No | Date of DST | BDQ MIC (µg/mL) | INH MIC (µg/mL) | Lab ID |
|--------------|------------------|-------------------|--------|-------------|-----------------|-----------------|--------|
| Lot 2        | Sigma Aldrich    | BCBL7582V         | 7      | 7/29/2014   | ≤ 0.008         | > 0.12          | Lab-6  |
| Lot 2        | Sigma Aldrich    | BCBL7582V         | 8      | 7/30/2014   | 0.015           | > 0.12          | Lab-6  |
| Lot 2        | Sigma Aldrich    | BCBL7582V         | 9      | 7/31/2014   | ≤ 0.008         | > 0.12          | Lab-6  |
| Lot 2        | Sigma Aldrich    | BCBL7582V         | 10     | 8/1/2014    | ≤ 0.008         | > 0.12          | Lab-6  |
| Lot 3        | Titan Biotech    | M2B4KN01          | 1      | 8/2/2014    | 0.03            | > 0.12          | Lab-6  |
| Lot 3        | Titan Biotech    | M2B4KN01          | 2      | 8/3/2014    | 0.015           | 0.12            | Lab-6  |
| Lot 3        | Titan Biotech    | M2B4KN01          | 3      | 8/4/2014    | 0.015           | 0.12            | Lab-6  |
| Lot 3        | Titan Biotech    | M2B4KN01          | 4      | 8/5/2014    | 0.015           | > 0.12          | Lab-6  |
| Lot 3        | Titan Biotech    | M2B4KN01          | 5      | 8/6/2014    | 0.015           | > 0.12          | Lab-6  |
| Lot 3        | Titan Biotech    | M2B4KN01          | 6      | 8/7/2014    | 0.015           | > 0.12          | Lab-6  |
| Lot 3        | Titan Biotech    | M2B4KN01          | 7      | 8/8/2014    | 0.03            | > 0.12          | Lab-6  |
| Lot 3        | Titan Biotech    | M2B4KN01          | 8      | 8/9/2014    | 0.015           | > 0.12          | Lab-6  |
| Lot 3        | Titan Biotech    | M2B4KN01          | 9      | 8/11/2014   | 0.015           | > 0.12          | Lab-6  |
| Lot 3        | Titan Biotech    | M2B4KN01          | 10     | 8/12/2014   | 0.015           | > 0.12          | Lab-6  |
| Lot 1        | Becton Dickinson | 3116410           | 1      | 09/25/14    | 0.03            | 0.12            | Lab-7  |
| Lot 1        | Becton Dickinson | 3116410           | 2      | 09/26/14    | 0.03            | 0.12            | Lab-7  |
| Lot 1        | Becton Dickinson | 3116410           | 3      | 09/26/14    | 0.06            | 0.12            | Lab-7  |
| Lot 1        | Becton Dickinson | 3116410           | 4      | 09/27/14    | 0.06            | 0.12            | Lab-7  |
| Lot 1        | Becton Dickinson | 3116410           | 5      | 09/28/14    | 0.06            | 0.12            | Lab-7  |

| Media Lot No | Supplier         | Supplier's Lot No | DST No | Date of DST | BDQ MIC (µg/mL) | INH MIC (µg/mL) | Lab ID |
|--------------|------------------|-------------------|--------|-------------|-----------------|-----------------|--------|
| Lot 1        | Becton Dickinson | 3116410           | 6      | 09/28/14    | 0.03            | 0.12            | Lab-7  |
| Lot 1        | Becton Dickinson | 3116410           | 7      | 09/28/14    | 0.03            | 0.12            | Lab-7  |
| Lot 1        | Becton Dickinson | 3116410           | 8      | 09/29/14    | 0.03            | 0.12            | Lab-7  |
| Lot 1        | Becton Dickinson | 3116410           | 9      | 09/30/12    | 0.06            | 0.12            | Lab-7  |
| Lot 1        | Becton Dickinson | 3116410           | 10     | 10/01/14    | 0.06            | 0.12            | Lab-7  |
| Lot 2        | Sigma Aldrich    | BCBL7582V         | 1      | 09/25/14    | 0.03            | >0.12           | Lab-7  |
| Lot 2        | Sigma Aldrich    | BCBL7582V         | 2      | 09/26/14    | 0.03            | >0.12           | Lab-7  |
| Lot 2        | Sigma Aldrich    | BCBL7582V         | 3      | 09/26/14    | 0.03            | >0.12           | Lab-7  |
| Lot 2        | Sigma Aldrich    | BCBL7582V         | 4      | 09/27/14    | 0.03            | >0.12           | Lab-7  |
| Lot 2        | Sigma Aldrich    | BCBL7582V         | 5      | 09/28/14    | 0.03            | >0.12           | Lab-7  |
| Lot 2        | Sigma Aldrich    | BCBL7582V         | 6      | 09/28/14    | 0.06            | >0.12           | Lab-7  |
| Lot 2        | Sigma Aldrich    | BCBL7582V         | 7      | 09/28/14    | 0.03            | >0.12           | Lab-7  |
| Lot 2        | Sigma Aldrich    | BCBL7582V         | 8      | 09/29/14    | 0.06            | >0.12           | Lab-7  |
| Lot 2        | Sigma Aldrich    | BCBL7582V         | 9      | 09/30/12    | 0.25*           | >0.12           | Lab-7  |
| Lot 2        | Sigma Aldrich    | BCBL7582V         | 10     | 10/01/14    | 0.03            | >0.12           | Lab-7  |
| Lot 3        | Titan Biotech    | M2B4KN01          | 1      | 09/25/14    | 0.015           | >0.12           | Lab-7  |
| Lot 3        | Titan Biotech    | M2B4KN01          | 2      | 09/26/14    | 0.015           | 0.12            | Lab-7  |
| Lot 3        | Titan Biotech    | M2B4KN01          | 3      | 09/26/14    | 0.06            | >0.12           | Lab-7  |
| Lot 3        | Titan Biotech    | M2B4KN01          | 4      | 09/27/14    | 0.06            | 0.12            | Lab-7  |

| Media Lot No | Supplier         | Supplier's Lot No | DST No | Date of DST | BDQ MIC (µg/mL) | INH MIC (µg/mL) | Lab ID |
|--------------|------------------|-------------------|--------|-------------|-----------------|-----------------|--------|
| Lot 3        | Titan Biotech    | M2B4KN01          | 5      | 09/28/14    | 0.015           | 0.12            | Lab-7  |
| Lot 3        | Titan Biotech    | M2B4KN01          | 6      | 09/28/14    | 0.015           | 0.12            | Lab-7  |
| Lot 3        | Titan Biotech    | M2B4KN01          | 7      | 09/28/14    | 0.015           | 0.12            | Lab-7  |
| Lot 3        | Titan Biotech    | M2B4KN01          | 8      | 09/29/14    | 0.015           | 0.12            | Lab-7  |
| Lot 3        | Titan Biotech    | M2B4KN01          | 9      | 09/30/12    | 0.015           | 0.12            | Lab-7  |
| Lot 3        | Titan Biotech    | M2B4KN01          | 10     | 10/01/14    | 0.015           | 0.12            | Lab-7  |
| Lot 1        | Becton Dickinson | 3116410           | 1      | 8/18/14     | 0.06            |                 | Lab-8  |
| Lot 1        | Becton Dickinson | 3116410           | 2      | 8/25/14     | 0.06            |                 | Lab-8  |
| Lot 1        | Becton Dickinson | 3116410           | 3      | 9/2/14      | 0.06            |                 | Lab-8  |
| Lot 1        | Becton Dickinson | 3116410           | 4      | 9/4/14      | 0.06            |                 | Lab-8  |
| Lot 1        | Becton Dickinson | 3116410           | 5      | 9/17/14     | 0.06            |                 | Lab-8  |
| Lot 1        | Becton Dickinson | 3116410           | 6      | 9/29/14     | 0.25            |                 | Lab-8  |
| Lot 1        | Becton Dickinson | 3116410           | 7      | 10/06/14    | 0.06            |                 | Lab-8  |
| Lot 1        | Becton Dickinson | 3116410           | 8      | 10/14/14    | 0.06            |                 | Lab-8  |
| Lot 1        | Becton Dickinson | 3116410           | 9      | 10/14/14    | 0.12            |                 | Lab-8  |
| Lot 1        | Becton Dickinson | 3116410           | 10     | 10/20/14    | 0.12            |                 | Lab-8  |
| Lot 2        | Sigma Aldrich    | BCBL7582V         | 1      | 8/18/14     | 0.03            |                 | Lab-8  |
| Lot 2        | Sigma Aldrich    | BCBL7582V         | 2      | 8/25/14     | 0.03            |                 | Lab-8  |
| Lot 2        | Sigma Aldrich    | BCBL7582V         | 3      | 9/2/14      | 0.03            |                 | Lab-8  |



| <b>Media Lot No</b> | <b>Supplier</b> | <b>Supplier's Lot No</b> | <b>DST No</b> | <b>Date of DST</b> | <b>BDQ MIC (µg/mL)</b> | <b>INH MIC (µg/mL)</b> | <b>Lab ID</b> |
|---------------------|-----------------|--------------------------|---------------|--------------------|------------------------|------------------------|---------------|
| Lot 2               | Sigma Aldrich   | BCBL7582V                | 4             | 9/4/14             | 0.03                   |                        | Lab-8         |
| Lot 2               | Sigma Aldrich   | BCBL7582V                | 5             | 9/17/14            | 0.06                   |                        | Lab-8         |
| Lot 2               | Sigma Aldrich   | BCBL7582V                | 6             | 9/29/14            | 0.03                   |                        | Lab-8         |
| Lot 2               | Sigma Aldrich   | BCBL7582V                | 7             | 10/06/14           | 0.06                   |                        | Lab-8         |
| Lot 2               | Sigma Aldrich   | BCBL7582V                | 8             | 10/14/14           | 0.03                   |                        | Lab-8         |
| Lot 2               | Sigma Aldrich   | BCBL7582V                | 9             | 10/14/14           | 0.06                   |                        | Lab-8         |
| Lot 2               | Sigma Aldrich   | BCBL7582V                | 10            | 10/20/14           | 0.06                   |                        | Lab-8         |
| Lot 3               | Titan Biotech   | M2B4KN01                 | 1             | 8/18/14            | 0.06                   |                        | Lab-8         |
| Lot 3               | Titan Biotech   | M2B4KN01                 | 2             | 8/25/14            | 0.06                   |                        | Lab-8         |
| Lot 3               | Titan Biotech   | M2B4KN01                 | 3             | 9/2/14             | 0.06                   |                        | Lab-8         |
| Lot 3               | Titan Biotech   | M2B4KN01                 | 4             | 9/4/14             | 0.03                   |                        | Lab-8         |
| Lot 3               | Titan Biotech   | M2B4KN01                 | 5             | 9/17/14            | 0.06                   |                        | Lab-8         |
| Lot 3               | Titan Biotech   | M2B4KN01                 | 6             | 9/29/14            | 0.03                   |                        | Lab-8         |
| Lot 3               | Titan Biotech   | M2B4KN01                 | 7             | 10/06/14           | 0.06                   |                        | Lab-8         |
| Lot 3               | Titan Biotech   | M2B4KN01                 | 8             | 10/14/14           | 0.06                   |                        | Lab-8         |
| Lot 3               | Titan Biotech   | M2B4KN01                 | 9             | 10/14/14           | 0.12                   |                        | Lab-8         |
| Lot 3               | Titan Biotech   | M2B4KN01                 | 10            | 10/20/14           | 0.12                   |                        | Lab-8         |

**Table S2.** 7H11 agar dilution raw data from all laboratories for bedaquiline tested against the MTB H37Rv strain

DST, drug susceptibility test; BDQ, bedaquiline; MIC, minimal inhibitory concentration; INH, isoniazid

| Media Lot No | Supplier         | Supplier's Lot No | DST No | Date of DST | BDQ MIC ( $\mu\text{g}/\text{mL}$ ) | INH MIC ( $\mu\text{g}/\text{mL}$ ) | Lab ID |
|--------------|------------------|-------------------|--------|-------------|-------------------------------------|-------------------------------------|--------|
| Lot 1        | Becton Dickinson | 3189213           | 1      | 4/24/2014   | 0.03                                | 0.12                                | Lab-1  |
| Lot 1        | Becton Dickinson | 3189213           | 2      | 4/25/2014   | 0.06                                | 0.12                                | Lab-1  |
| Lot 1        | Becton Dickinson | 3189213           | 3      | 4/28/2014   | 0.06                                | 0.12                                | Lab-1  |
| Lot 1        | Becton Dickinson | 3189213           | 4      | 4/29/2014   | 0.03                                | 0.12                                | Lab-1  |
| Lot 1        | Becton Dickinson | 3189213           | 5      | 5/5/2014    | 0.03                                | 0.06                                | Lab-1  |
| Lot 1        | Becton Dickinson | 3189213           | 6      | 5/6/2014    | 0.015                               | 0.12                                | Lab-1  |
| Lot 1        | Becton Dickinson | 3189213           | 7      | 5/19/2014   | 0.12                                | 0.12                                | Lab-1  |
| Lot 1        | Becton Dickinson | 3189213           | 8      | 5/21/2014   | 0.12                                | 0.12                                | Lab-1  |
| Lot 1        | Becton Dickinson | 3189213           | 9      | 5/22/2014   | 0.06                                | 0.12                                | Lab-1  |
| Lot 1        | Becton Dickinson | 3189213           | 10     | 6/4/2014    | 0.12                                | 0.12                                | Lab-1  |
| Lot 2        | Sigma Aldrich    | BCBL4307V         | 1      | 4/24/2014   | 0.03                                | 0.12                                | Lab-1  |
| Lot 2        | Sigma Aldrich    | BCBL4307V         | 2      | 4/25/2014   | 0.03                                | 0.12                                | Lab-1  |
| Lot 2        | Sigma Aldrich    | BCBL4307V         | 3      | 4/28/2014   | 0.03                                | 0.12                                | Lab-1  |
| Lot 2        | Sigma Aldrich    | BCBL4307V         | 4      | 4/29/2014   | 0.06                                | 0.12                                | Lab-1  |
| Lot 2        | Sigma Aldrich    | BCBL4307V         | 5      | 5/5/2014    | 0.03                                | 0.12                                | Lab-1  |
| Lot 2        | Sigma Aldrich    | BCBL4307V         | 6      | 5/6/2014    | 0.03                                | 0.12                                | Lab-1  |
| Lot 2        | Sigma Aldrich    | BCBL4307V         | 7      | 5/19/2014   | 0.06                                | 0.12                                | Lab-1  |

| Media Lot No | Supplier         | Supplier's Lot No | DST No | Date of DST | BDQ MIC (µg/mL) | INH MIC (µg/mL) | Lab ID |
|--------------|------------------|-------------------|--------|-------------|-----------------|-----------------|--------|
| Lot 2        | Sigma Aldrich    | BCBL4307V         | 8      | 5/21/2014   | 0.06            | 0.12            | Lab-1  |
| Lot 2        | Sigma Aldrich    | BCBL4307V         | 9      | 5/22/2014   | 0.12            | 0.12            | Lab-1  |
| Lot 2        | Sigma Aldrich    | BCBL4307V         | 10     | 6/4/2014    | 0.12            | 0.12            | Lab-1  |
| Lot 3        | Titan Biotech    | M716KN01          | 1      | 4/24/2014   | 0.03            | 0.12            | Lab-1  |
| Lot 3        | Titan Biotech    | M716KN01          | 2      | 4/25/2014   | 0.03            | 0.12            | Lab-1  |
| Lot 3        | Titan Biotech    | M716KN01          | 3      | 4/28/2014   | 0.06            | 0.06            | Lab-1  |
| Lot 3        | Titan Biotech    | M716KN01          | 4      | 4/29/2014   | 0.03            | 0.12            | Lab-1  |
| Lot 3        | Titan Biotech    | M716KN01          | 5      | 5/5/2014    | 0.03            | 0.12            | Lab-1  |
| Lot 3        | Titan Biotech    | M716KN01          | 6      | 5/6/2014    | 0.06            | 0.12            | Lab-1  |
| Lot 3        | Titan Biotech    | M716KN01          | 7      | 5/19/2014   | 0.06            | 0.12            | Lab-1  |
| Lot 3        | Titan Biotech    | M716KN01          | 8      | 5/21/2014   | 0.12            | 0.12            | Lab-1  |
| Lot 3        | Titan Biotech    | M716KN01          | 9      | 5/22/2014   | 0.06            | 0.12            | Lab-1  |
| Lot 3        | Titan Biotech    | M716KN01          | 10     | 6/4/2014    | 0.06            | 0.12            | Lab-1  |
| Lot 1        | Becton Dickinson | 3189213           | 1      | 3/18/2014   | 0.06            | 0.03            | Lab-2  |
| Lot 1        | Becton Dickinson | 3189213           | 2      | 3/25/2014   | 0.03            | 0.12            | Lab-2  |
| Lot 1        | Becton Dickinson | 3189213           | 3      | 5/19/2014   | 0.03            | 0.12            | Lab-2  |
| Lot 1        | Becton Dickinson | 3189213           | 4      | 5/19/2014   | 0.03            | 0.12            | Lab-2  |
| Lot 1        | Becton Dickinson | 3189213           | 5      | 5/19/2014   | 0.03            | 0.12            | Lab-2  |
| Lot 1        | Becton Dickinson | 3189213           | 6      | 5/20/2014   | 0.03            | 0.12            | Lab-2  |

| Media Lot No | Supplier         | Supplier's Lot No | DST No | Date of DST | BDQ MIC (µg/mL) | INH MIC (µg/mL) | Lab ID |
|--------------|------------------|-------------------|--------|-------------|-----------------|-----------------|--------|
| Lot 1        | Becton Dickinson | 3189213           | 7      | 5/20/2014   | 0.03            | 0.003           | Lab-2  |
| Lot 1        | Becton Dickinson | 3189213           | 8      | 5/20/2014   | 0.03            | 0.12            | Lab-2  |
| Lot 1        | Becton Dickinson | 3189213           | 9      | 6/13/2014   | 0.06            | 0.12            | Lab-2  |
| Lot 1        | Becton Dickinson | 3189213           | 10     | 6/13/2014   | 0.03            | 0.12            | Lab-2  |
| Lot 1        | Becton Dickinson | 3189213           | 11     | 6/13/2014   | 0.03            | 0.12            | Lab-2  |
| Lot 2        | Sigma Aldrich    | BCBL4307V         | 1      | 3/18/2014   | 0.03            | 0.12            | Lab-2  |
| Lot 2        | Sigma Aldrich    | BCBL4307V         | 2      | 3/25/2014   | 0.06            | >0.25           | Lab-2  |
| Lot 2        | Sigma Aldrich    | BCBL4307V         | 3      | 5/19/2014   | 0.03            | >0.25           | Lab-2  |
| Lot 2        | Sigma Aldrich    | BCBL4307V         | 4      | 5/19/2014   | 0.03            | >0.25           | Lab-2  |
| Lot 2        | Sigma Aldrich    | BCBL4307V         | 5      | 5/19/2014   | 0.03            | >0.25           | Lab-2  |
| Lot 2        | Sigma Aldrich    | BCBL4307V         | 6      | 5/20/2014   | 0.015           | 0.03            | Lab-2  |
| Lot 2        | Sigma Aldrich    | BCBL4307V         | 7      | 5/20/2014   | 0.03            | >0.25           | Lab-2  |
| Lot 2        | Sigma Aldrich    | BCBL4307V         | 8      | 5/20/2014   | 0.03            | >0.25           | Lab-2  |
| Lot 2        | Sigma Aldrich    | BCBL4307V         | 9      | 6/13/2014   | 0.03            | >0.25           | Lab-2  |
| Lot 2        | Sigma Aldrich    | BCBL4307V         | 10     | 6/13/2014   | 0.03            | >0.25           | Lab-2  |
| Lot 2        | Sigma Aldrich    | BCBL4307V         | 11     | 6/13/2014   | 0.03            | >0.25           | Lab-2  |
| Lot 3        | Titan Biotech    | M7I6KN01          | 1      | 3/18/2014   | 0.03            | 0.06            | Lab-2  |
| Lot 3        | Titan Biotech    | M7I6KN01          | 2      | 3/25/2014   | 0.03            | 0.25            | Lab-2  |
| Lot 3        | Titan Biotech    | M7I6KN01          | 3      | 5/19/2014   | <0.008          | 0.12            | Lab-2  |

| Media Lot No | Supplier         | Supplier's Lot No | DST No | Date of DST | BDQ MIC (µg/mL) | INH MIC (µg/mL) | Lab ID |
|--------------|------------------|-------------------|--------|-------------|-----------------|-----------------|--------|
| Lot 3        | Titan Biotech    | M7I6KN01          | 4      | 5/19/2014   | 0.03            | 0.12            | Lab-2  |
| Lot 3        | Titan Biotech    | M7I6KN01          | 6      | 5/20/2014   | 0.015           | 0.06            | Lab-2  |
| Lot 3        | Titan Biotech    | M7I6KN01          | 7      | 5/20/2014   | 0.03            | 0.03            | Lab-2  |
| Lot 3        | Titan Biotech    | M7I6KN01          | 8      | 5/20/2014   | 0.03            | 0.12            | Lab-2  |
| Lot 3        | Titan Biotech    | M7I6KN01          | 9      | 6/13/2014   | 0.03            | 0.25            | Lab-2  |
| Lot 3        | Titan Biotech    | M7I6KN01          | 10     | 6/13/2014   | 0.015           | 0.25            | Lab-2  |
| Lot 3        | Titan Biotech    | M7I6KN01          | 11     | 6/13/2014   | 0.03            | 0.12            | Lab-2  |
| Lot 1        | Becton Dickinson | 3189213           | 1      | 6/16/2014   | 0.03            | 0.12            | Lab-3  |
| Lot 1        | Becton Dickinson | 3189213           | 2      | 6/16/2014   | 0.03            | 0.12            | Lab-3  |
| Lot 1        | Becton Dickinson | 3189213           | 3      | 6/16/2014   | 0.03            | 0.06            | Lab-3  |
| Lot 1        | Becton Dickinson | 3189213           | 4      | 6/16/2014   | 0.03            | 0.06            | Lab-3  |
| Lot 1        | Becton Dickinson | 3189213           | 5      | 6/16/2014   | 0.03            | 0.06            | Lab-3  |
| Lot 1        | Becton Dickinson | 3189213           | 6      | 6/17/2014   | 0.03            | 0.12            | Lab-3  |
| Lot 1        | Becton Dickinson | 3189213           | 7      | 6/17/2014   | 0.03            | 0.06            | Lab-3  |
| Lot 1        | Becton Dickinson | 3189213           | 8      | 6/17/2014   | 0.03            | 0.12            | Lab-3  |
| Lot 1        | Becton Dickinson | 3189213           | 9      | 6/17/2014   | 0.06            | 0.12            | Lab-3  |
| Lot 1        | Becton Dickinson | 3189213           | 10     | 6/17/2014   | 0.06            | 0.12            | Lab-3  |
| Lot 2        | Sigma Aldrich    | BCBL4307V         | 1      | 6/30/2014   | 0.03            | 0.12            | Lab-3  |
| Lot 2        | Sigma Aldrich    | BCBL4307V         | 2      | 6/30/2014   | 0.03            | 0.06            | Lab-3  |

| Media Lot No | Supplier         | Supplier's Lot No | DST No | Date of DST | BDQ MIC (µg/mL) | INH MIC (µg/mL) | Lab ID |
|--------------|------------------|-------------------|--------|-------------|-----------------|-----------------|--------|
| Lot 2        | Sigma Aldrich    | BCBL4307V         | 3      | 6/30/2014   | 0.03            | 0.12            | Lab-3  |
| Lot 2        | Sigma Aldrich    | BCBL4307V         | 4      | 6/30/2014   | 0.03            | 0.12            | Lab-3  |
| Lot 2        | Sigma Aldrich    | BCBL4307V         | 5      | 6/30/2014   | 0.03            | 0.12            | Lab-3  |
| Lot 2        | Sigma Aldrich    | BCBL4307V         | 6      | 7/1/2014    | 0.06            | 0.12            | Lab-3  |
| Lot 2        | Sigma Aldrich    | BCBL4307V         | 7      | 7/1/2014    | 0.06            | 0.12            | Lab-3  |
| Lot 2        | Sigma Aldrich    | BCBL4307V         | 8      | 7/1/2014    | 0.06            | 0.12            | Lab-3  |
| Lot 2        | Sigma Aldrich    | BCBL4307V         | 9      | 7/1/2014    | 0.06            | 0.06            | Lab-3  |
| Lot 2        | Sigma Aldrich    | BCBL4307V         | 10     | 7/1/2014    | 0.06            | 0.12            | Lab-3  |
| Lot 3        | Titan Biotech    | M7I6KN01          | 1      | 8/19/2014   | 0.03            | 0.12            | Lab-3  |
| Lot 3        | Titan Biotech    | M7I6KN01          | 2      | 8/19/2014   | 0.03            | 0.12            | Lab-3  |
| Lot 3        | Titan Biotech    | M7I6KN01          | 3      | 8/19/2014   | 0.03            | 0.12            | Lab-3  |
| Lot 3        | Titan Biotech    | M7I6KN01          | 4      | 8/19/2014   | 0.03            | 0.12            | Lab-3  |
| Lot 3        | Titan Biotech    | M7I6KN01          | 5      | 8/19/2014   | 0.03            | 0.12            | Lab-3  |
| Lot 3        | Titan Biotech    | M7I6KN01          | 6      | 8/20/2014   | 0.03            | 0.12            | Lab-3  |
| Lot 3        | Titan Biotech    | M7I6KN01          | 7      | 8/20/2014   | 0.03            | 0.12            | Lab-3  |
| Lot 3        | Titan Biotech    | M7I6KN01          | 8      | 8/20/2014   | 0.03            | 0.12            | Lab-3  |
| Lot 3        | Titan Biotech    | M7I6KN01          | 9      | 8/20/2014   | 0.03            | 0.12            | Lab-3  |
| Lot 3        | Titan Biotech    | M7I6KN01          | 10     | 8/20/2014   | 0.03            | 0.12            | Lab-3  |
| Lot 1        | Becton Dickinson | 3189213           | 1      | 7/31/2014   | 0.06            | 0.12            | Lab-4  |

| <b>Media Lot No</b> | <b>Supplier</b>  | <b>Supplier's Lot No</b> | <b>DST No</b> | <b>Date of DST</b> | <b>BDQ MIC (µg/mL)</b> | <b>INH MIC (µg/mL)</b> | <b>Lab ID</b> |
|---------------------|------------------|--------------------------|---------------|--------------------|------------------------|------------------------|---------------|
| Lot 1               | Becton Dickinson | 3189213                  | 2             | 7/31/2014          | 0.06                   | 0.12                   | Lab-4         |
| Lot 1               | Becton Dickinson | 3189213                  | 3             | 7/31/2014          | 0.06                   | 0.12                   | Lab-4         |
| Lot 1               | Becton Dickinson | 3189213                  | 4             | 7/31/2014          | 0.06                   | 0.12                   | Lab-4         |
| Lot 1               | Becton Dickinson | 3189213                  | 5             | 7/31/2014          | 0.06                   | 0.12                   | Lab-4         |
| Lot 1               | Becton Dickinson | 3189213                  | 6             | 7/31/2014          | 0.06                   | 0.12                   | Lab-4         |
| Lot 1               | Becton Dickinson | 3189213                  | 7             | 7/31/2014          | 0.06                   | 0.12                   | Lab-4         |
| Lot 1               | Becton Dickinson | 3189213                  | 8             | 7/31/2014          | 0.06                   | 0.12                   | Lab-4         |
| Lot 1               | Becton Dickinson | 3189213                  | 9             | 7/31/2014          | 0.06                   | 0.12                   | Lab-4         |
| Lot 1               | Becton Dickinson | 3189213                  | 10            | 7/31/2014          | 0.06                   | 0.12                   | Lab-4         |
| Lot 2               | Sigma Aldrich    | BCBL4307V                | 1             | 8/21/2014          | 0.06                   | >0.12                  | Lab-4         |
| Lot 2               | Sigma Aldrich    | BCBL4307V                | 2             | 8/21/2014          | 0.06                   | >0.12                  | Lab-4         |
| Lot 2               | Sigma Aldrich    | BCBL4307V                | 3             | 8/21/2014          | 0.06                   | >0.12                  | Lab-4         |
| Lot 2               | Sigma Aldrich    | BCBL4307V                | 4             | 8/21/2014          | 0.06                   | >0.12                  | Lab-4         |
| Lot 2               | Sigma Aldrich    | BCBL4307V                | 5             | 8/21/2014          | 0.06                   | >0.12                  | Lab-4         |
| Lot 2               | Sigma Aldrich    | BCBL4307V                | 6             | 8/21/2014          | 0.06                   | >0.12                  | Lab-4         |
| Lot 2               | Sigma Aldrich    | BCBL4307V                | 7             | 8/21/2014          | 0.06                   | >0.12                  | Lab-4         |
| Lot 2               | Sigma Aldrich    | BCBL4307V                | 8             | 8/21/2014          | 0.06                   | >0.12                  | Lab-4         |
| Lot 2               | Sigma Aldrich    | BCBL4307V                | 9             | 8/21/2014          | 0.06                   | >0.12                  | Lab-4         |
| Lot 2               | Sigma Aldrich    | BCBL4307V                | 10            | 8/21/2014          | 0.06                   | >0.12                  | Lab-4         |

| Media Lot No | Supplier         | Supplier's Lot No | DST No | Date of DST | BDQ MIC (µg/mL) | INH MIC (µg/mL) | Lab ID |
|--------------|------------------|-------------------|--------|-------------|-----------------|-----------------|--------|
| Lot 3        | Titan Biotech    | M7I6KN01          | 1      | 9/3/2014    | 0.06            | 0.12            | Lab-4  |
| Lot 3        | Titan Biotech    | M7I6KN01          | 2      | 9/3/2014    | 0.06            | 0.12            | Lab-4  |
| Lot 3        | Titan Biotech    | M7I6KN01          | 3      | 9/3/2014    | 0.06            | 0.12            | Lab-4  |
| Lot 3        | Titan Biotech    | M7I6KN01          | 4      | 9/3/2014    | 0.06            | 0.12            | Lab-4  |
| Lot 3        | Titan Biotech    | M7I6KN01          | 5      | 9/3/2014    | 0.06            | 0.12            | Lab-4  |
| Lot 3        | Titan Biotech    | M7I6KN01          | 6      | 9/3/2014    | 0.06            | 0.12            | Lab-4  |
| Lot 3        | Titan Biotech    | M7I6KN01          | 7      | 9/3/2014    | 0.06            | 0.12            | Lab-4  |
| Lot 3        | Titan Biotech    | M7I6KN01          | 8      | 9/3/2014    | 0.06            | 0.12            | Lab-4  |
| Lot 3        | Titan Biotech    | M7I6KN01          | 9      | 9/3/2014    | 0.06            | 0.12            | Lab-4  |
| Lot 3        | Titan Biotech    | M7I6KN01          | 10     | 9/3/2014    | 0.06            | 0.12            | Lab-4  |
| Lot 1        | Becton Dickinson | 3189213           | 1      | 8/29/2014   | 0.06            | 0.12            | Lab-5  |
| Lot 1        | Becton Dickinson | 3189213           | 2      | 8/29/2014   | 0.06            | 0.12            | Lab-5  |
| Lot 1        | Becton Dickinson | 3189213           | 3      | 8/29/2014   | 0.12            | 0.12            | Lab-5  |
| Lot 1        | Becton Dickinson | 3189213           | 4      | 8/29/2014   | 0.12            | 0.12            | Lab-5  |
| Lot 1        | Becton Dickinson | 3189213           | 5      | 8/29/2014   | 0.06            | 0.12            | Lab-5  |
| Lot 1        | Becton Dickinson | 3189213           | 6      | 8/29/2014   | 0.06            | 0.12            | Lab-5  |
| Lot 1        | Becton Dickinson | 3189213           | 7      | 8/29/2014   | 0.06            | 0.12            | Lab-5  |
| Lot 1        | Becton Dickinson | 3189213           | 8      | 8/29/2014   | 0.06            | 0.12            | Lab-5  |
| Lot 1        | Becton Dickinson | 3189213           | 9      | 8/29/2014   | 0.06            | 0.12            | Lab-5  |



| Media Lot No | Supplier         | Supplier's Lot No | DST No | Date of DST | BDQ MIC (µg/mL) | INH MIC (µg/mL) | Lab ID |
|--------------|------------------|-------------------|--------|-------------|-----------------|-----------------|--------|
| Lot 1        | Becton Dickinson | 3189213           | 10     | 8/29/2014   | 0.03            | 0.12            | Lab-5  |
| Lot 2        | Sigma Aldrich    | BCBL4307V         | 1      | 9/10/2014   | 0.25            | >0.12           | Lab-5  |
| Lot 2        | Sigma Aldrich    | BCBL4307V         | 2      | 9/10/2014   | 0.12            | >0.12           | Lab-5  |
| Lot 2        | Sigma Aldrich    | BCBL4307V         | 3      | 9/10/2014   | 0.25            | >0.12           | Lab-5  |
| Lot 2        | Sigma Aldrich    | BCBL4307V         | 4      | 9/10/2014   | 0.25            | >0.12           | Lab-5  |
| Lot 2        | Sigma Aldrich    | BCBL4307V         | 5      | 9/10/2014   | 0.25            | >0.12           | Lab-5  |
| Lot 2        | Sigma Aldrich    | BCBL4307V         | 6      | 9/10/2014   | 0.25            | >0.12           | Lab-5  |
| Lot 2        | Sigma Aldrich    | BCBL4307V         | 7      | 9/10/2014   | 0.25            | >0.12           | Lab-5  |
| Lot 2        | Sigma Aldrich    | BCBL4307V         | 8      | 9/10/2014   | 0.25            | >0.12           | Lab-5  |
| Lot 2        | Sigma Aldrich    | BCBL4307V         | 9      | 9/10/2014   | 0.25            | >0.12           | Lab-5  |
| Lot 2        | Sigma Aldrich    | BCBL4307V         | 10     | 9/10/2014   | 0.25            | >0.12           | Lab-5  |
| Lot 3        | Titan Biotech    | M716KN01          | 1      | 9/5/2014    | 0.12            | 0.12            | Lab-5  |
| Lot 3        | Titan Biotech    | M716KN01          | 2      | 9/5/2014    | 0.06            | 0.12            | Lab-5  |
| Lot 3        | Titan Biotech    | M716KN01          | 3      | 9/5/2014    | 0.06            | 0.12            | Lab-5  |
| Lot 3        | Titan Biotech    | M716KN01          | 4      | 9/5/2014    | 0.06            | 0.12            | Lab-5  |
| Lot 3        | Titan Biotech    | M716KN01          | 5      | 9/5/2014    | 0.03            | 0.12            | Lab-5  |
| Lot 3        | Titan Biotech    | M716KN01          | 6      | 9/5/2014    | 0.12            | 0.12            | Lab-5  |
| Lot 3        | Titan Biotech    | M716KN01          | 7      | 9/5/2014    | 0.03            | 0.12            | Lab-5  |
| Lot 3        | Titan Biotech    | M716KN01          | 8      | 9/5/2014    | 0.06            | 0.12            | Lab-5  |

| Media Lot No | Supplier         | Supplier's Lot No | DST No | Date of DST | BDQ MIC (µg/mL) | INH MIC (µg/mL) | Lab ID |
|--------------|------------------|-------------------|--------|-------------|-----------------|-----------------|--------|
| Lot 3        | Titan Biotech    | M7I6KN01          | 9      | 9/5/2014    | 0.06            | 0.12            | Lab-5  |
| Lot 3        | Titan Biotech    | M7I6KN01          | 10     | 9/5/2014    | 0.06            | 0.12            | Lab-5  |
| Lot 1        | Becton Dickinson | 3189213           | 1      | 8/13/2014   | 0.06            | > 0.12          | Lab-6  |
| Lot 1        | Becton Dickinson | 3189213           | 2      | 8/14/2014   | 0.06            | > 0.12          | Lab-6  |
| Lot 1        | Becton Dickinson | 3189213           | 3      | 8/18/2014   | 0.06            | > 0.12          | Lab-6  |
| Lot 1        | Becton Dickinson | 3189213           | 4      | 8/19/2014   | 0.06            | > 0.12          | Lab-6  |
| Lot 1        | Becton Dickinson | 3189213           | 5      | 8/20/2014   | 0.06            | > 0.12          | Lab-6  |
| Lot 1        | Becton Dickinson | 3189213           | 6      | 8/21/2014   | 0.06            | > 0.12          | Lab-6  |
| Lot 1        | Becton Dickinson | 3189213           | 7      | 8/22/2014   | 0.06            | > 0.12          | Lab-6  |
| Lot 1        | Becton Dickinson | 3189213           | 8      | 8/25/2014   | 0.06            | > 0.12          | Lab-6  |
| Lot 1        | Becton Dickinson | 3189213           | 9      | 8/26/2014   | 0.03            | > 0.12          | Lab-6  |
| Lot 1        | Becton Dickinson | 3189213           | 10     | 8/27/2014   | 0.06            | > 0.12          | Lab-6  |
| Lot 2        | Sigma Aldrich    | BCBL4307V         | 1      | 9/18/2014   | 0.015           | > 0.12          | Lab-6  |
| Lot 2        | Sigma Aldrich    | BCBL4307V         | 2      | 9/18/2014   | 0.015           | > 0.12          | Lab-6  |
| Lot 2        | Sigma Aldrich    | BCBL4307V         | 3      | 9/18/2014   | 0.015           | > 0.12          | Lab-6  |
| Lot 2        | Sigma Aldrich    | BCBL4307V         | 4      | 9/18/2014   | 0.015           | > 0.12          | Lab-6  |
| Lot 2        | Sigma Aldrich    | BCBL4307V         | 5      | 9/18/2014   | 0.015           | > 0.12          | Lab-6  |
| Lot 2        | Sigma Aldrich    | BCBL4307V         | 6      | 9/19/2014   | 0.015           | > 0.12          | Lab-6  |
| Lot 2        | Sigma Aldrich    | BCBL4307V         | 7      | 9/19/2014   | 0.015           | > 0.12          | Lab-6  |

| Media Lot No | Supplier         | Supplier's Lot No | DST No | Date of DST | BDQ MIC (µg/mL) | INH MIC (µg/mL) | Lab ID |
|--------------|------------------|-------------------|--------|-------------|-----------------|-----------------|--------|
| Lot 2        | Sigma Aldrich    | BCBL4307V         | 8      | 9/19/2014   | 0.015           | > 0.12          | Lab-6  |
| Lot 2        | Sigma Aldrich    | BCBL4307V         | 9      | 9/20/2014   | 0.015           | > 0.12          | Lab-6  |
| Lot 2        | Sigma Aldrich    | BCBL4307V         | 10     | 9/20/2014   | 0.015           | > 0.12          | Lab-6  |
| Lot 3        | Titan Biotech    | M716KN01          | 1      | 9/25/2014   | 0.03            | 0.12            | Lab-6  |
| Lot 3        | Titan Biotech    | M716KN01          | 2      | 9/25/2014   | 0.03            | 0.12            | Lab-6  |
| Lot 3        | Titan Biotech    | M716KN01          | 3      | 9/25/2014   | 0.03            | 0.12            | Lab-6  |
| Lot 3        | Titan Biotech    | M716KN01          | 4      | 9/26/2014   | 0.03            | 0.12            | Lab-6  |
| Lot 3        | Titan Biotech    | M716KN01          | 5      | 9/26/2014   | 0.03            | 0.12            | Lab-6  |
| Lot 3        | Titan Biotech    | M716KN01          | 6      | 9/27/2014   | 0.015           | 0.12            | Lab-6  |
| Lot 3        | Titan Biotech    | M716KN01          | 7      | 9/27/2014   | 0.03            | 0.12            | Lab-6  |
| Lot 3        | Titan Biotech    | M716KN01          | 8      | 9/27/2014   | 0.015           | 0.12            | Lab-6  |
| Lot 3        | Titan Biotech    | M716KN01          | 9      | 9/28/2014   | 0.015           | 0.12            | Lab-6  |
| Lot 3        | Titan Biotech    | M716KN01          | 10     | 9/28/2014   | 0.03            | 0.12            | Lab-6  |
| Lot 1        | Becton Dickinson | 3189213           | 1      | 09/25/14    | 0.03            | 0.12            | Lab-7  |
| Lot 1        | Becton Dickinson | 3189213           | 2      | 09/26/14    | 0.03            | 0.12            | Lab-7  |
| Lot 1        | Becton Dickinson | 3189213           | 3      | 09/26/14    | 0.03            | 0.12            | Lab-7  |
| Lot 1        | Becton Dickinson | 3189213           | 4      | 09/27/14    | 0.03            | 0.12            | Lab-7  |
| Lot 1        | Becton Dickinson | 3189213           | 5      | 09/28/14    | 0.06            | 0.12            | Lab-7  |
| Lot 1        | Becton Dickinson | 3189213           | 6      | 09/28/14    | 0.06            | 0.12            | Lab-7  |

| Media Lot No | Supplier         | Supplier's Lot No | DST No | Date of DST | BDQ MIC (µg/mL) | INH MIC (µg/mL) | Lab ID |
|--------------|------------------|-------------------|--------|-------------|-----------------|-----------------|--------|
| Lot 1        | Becton Dickinson | 3189213           | 7      | 09/28/14    | 0.03            | 0.12            | Lab-7  |
| Lot 1        | Becton Dickinson | 3189213           | 8      | 09/29/14    | 0.06            | 0.12            | Lab-7  |
| Lot 1        | Becton Dickinson | 3189213           | 9      | 09/30/12    | 0.06            | 0.12            | Lab-7  |
| Lot 1        | Becton Dickinson | 3189213           | 10     | 10/01/14    | 0.06            | 0.12            | Lab-7  |
| Lot 2        | Sigma Aldrich    | BCBL4307V         | 1      | 09/25/14    | 0.03            | >0.12           | Lab-7  |
| Lot 2        | Sigma Aldrich    | BCBL4307V         | 2      | 09/26/14    | 0.03            | >0.12           | Lab-7  |
| Lot 2        | Sigma Aldrich    | BCBL4307V         | 3      | 09/26/14    | 0.03            | >0.12           | Lab-7  |
| Lot 2        | Sigma Aldrich    | BCBL4307V         | 4      | 09/27/14    | 0.03            | >0.12           | Lab-7  |
| Lot 2        | Sigma Aldrich    | BCBL4307V         | 5      | 09/28/14    | 0.06            | >0.12           | Lab-7  |
| Lot 2        | Sigma Aldrich    | BCBL4307V         | 6      | 09/28/14    | 0.03            | >0.12           | Lab-7  |
| Lot 2        | Sigma Aldrich    | BCBL4307V         | 7      | 09/28/14    | 0.03            | >0.12           | Lab-7  |
| Lot 2        | Sigma Aldrich    | BCBL4307V         | 8      | 09/29/14    | 0.03            | >0.12           | Lab-7  |
| Lot 2        | Sigma Aldrich    | BCBL4307V         | 9      | 09/30/12    | 0.06            | >0.12           | Lab-7  |
| Lot 2        | Sigma Aldrich    | BCBL4307V         | 10     | 10/01/14    | 0.06            | >0.12           | Lab-7  |
| Lot 3        | Titan Biotech    | M716KN01          | 1      | 09/25/14    | 0.015           | >0.12           | Lab-7  |
| Lot 3        | Titan Biotech    | M716KN01          | 2      | 09/26/14    | 0.015           | >0.12           | Lab-7  |
| Lot 3        | Titan Biotech    | M716KN01          | 3      | 09/26/14    | 0.015           | >0.12           | Lab-7  |
| Lot 3        | Titan Biotech    | M716KN01          | 4      | 09/27/14    | 0.015           | >0.12           | Lab-7  |
| Lot 3        | Titan Biotech    | M716KN01          | 5      | 09/28/14    | 0.015           | 0.12            | Lab-7  |

| Media Lot No | Supplier         | Supplier's Lot No | DST No | Date of DST | BDQ MIC (µg/mL) | INH MIC (µg/mL) | Lab ID |
|--------------|------------------|-------------------|--------|-------------|-----------------|-----------------|--------|
| Lot 3        | Titan Biotech    | M7I6KN01          | 6      | 09/28/14    | 0.015           | 0.12            | Lab-7  |
| Lot 3        | Titan Biotech    | M7I6KN01          | 7      | 09/28/14    | 0.015           | 0.12            | Lab-7  |
| Lot 3        | Titan Biotech    | M7I6KN01          | 8      | 09/29/14    | 0.015           | 0.12            | Lab-7  |
| Lot 3        | Titan Biotech    | M7I6KN01          | 9      | 09/30/12    | 0.015           | 0.12            | Lab-7  |
| Lot 3        | Titan Biotech    | M7I6KN01          | 10     | 10/01/14    | 0.015           | 0.12            | Lab-7  |
| Lot 1        | Becton Dickinson | 3189213           | 1      | 8/18/14     | 0.03            | 0.12            | Lab-8  |
| Lot 1        | Becton Dickinson | 3189213           | 2      | 8/25/14     | 0.06            | 0.12            | Lab-8  |
| Lot 1        | Becton Dickinson | 3189213           | 3      | 9/2/14      | 0.06            | >0.12           | Lab-8  |
| Lot 1        | Becton Dickinson | 3189213           | 4      | 9/4/14      | 0.03            | 0.12            | Lab-8  |
| Lot 1        | Becton Dickinson | 3189213           | 5      | 9/17/14     | 0.06            | >0.12           | Lab-8  |
| Lot 1        | Becton Dickinson | 3189213           | 6      | 9/29/14     | 0.06            | >0.12           | Lab-8  |
| Lot 1        | Becton Dickinson | 3189213           | 7      | 10/06/14    | 0.06            | 0.12            | Lab-8  |
| Lot 1        | Becton Dickinson | 3189213           | 8      | 10/14/14    | 0.06            | 0.12            | Lab-8  |
| Lot 1        | Becton Dickinson | 3189213           | 9      | 10/14/14    | 0.06            | >0.12           | Lab-8  |
| Lot 1        | Becton Dickinson | 3189213           | 10     | 10/20/14    | 0.06            | 0.12            | Lab-8  |
| Lot 2        | Sigma Aldrich    | BCBL4307V         | 1      | 8/18/14     | 0.06            |                 | Lab-8  |
| Lot 2        | Sigma Aldrich    | BCBL4307V         | 2      | 8/25/14     | 0.06            |                 | Lab-8  |
| Lot 2        | Sigma Aldrich    | BCBL4307V         | 3      | 9/2/14      | 0.06            |                 | Lab-8  |
| Lot 2        | Sigma Aldrich    | BCBL4307V         | 4      | 9/4/14      | 0.06            |                 | Lab-8  |

| <b>Media Lot No</b> | <b>Supplier</b> | <b>Supplier's Lot No</b> | <b>DST No</b> | <b>Date of DST</b> | <b>BDQ MIC (µg/mL)</b> | <b>INH MIC (µg/mL)</b> | <b>Lab ID</b> |
|---------------------|-----------------|--------------------------|---------------|--------------------|------------------------|------------------------|---------------|
| Lot 2               | Sigma Aldrich   | BCBL4307V                | 5             | 9/17/14            | 0.06                   |                        | Lab-8         |
| Lot 2               | Sigma Aldrich   | BCBL4307V                | 6             | 9/29/14            | 0.06                   |                        | Lab-8         |
| Lot 2               | Sigma Aldrich   | BCBL4307V                | 7             | 10/06/14           | 0.06                   |                        | Lab-8         |
| Lot 2               | Sigma Aldrich   | BCBL4307V                | 8             | 10/14/14           | 0.06                   |                        | Lab-8         |
| Lot 2               | Sigma Aldrich   | BCBL4307V                | 9             | 10/14/14           | 0.12                   |                        | Lab-8         |
| Lot 2               | Sigma Aldrich   | BCBL4307V                | 10            | 10/20/14           | 0.06                   |                        | Lab-8         |
| Lot 3               | Titan Biotech   | M7I6KN01                 | 1             | 8/18/14            | 0.03                   |                        | Lab-8         |
| Lot 3               | Titan Biotech   | M7I6KN01                 | 2             | 8/25/14            | 0.06                   |                        | Lab-8         |
| Lot 3               | Titan Biotech   | M7I6KN01                 | 3             | 9/2/14             | 0.06                   |                        | Lab-8         |
| Lot 3               | Titan Biotech   | M7I6KN01                 | 4             | 9/4/14             | 0.03                   |                        | Lab-8         |
| Lot 3               | Titan Biotech   | M7I6KN01                 | 5             | 9/17/14            | 0.06                   |                        | Lab-8         |
| Lot 3               | Titan Biotech   | M7I6KN01                 | 6             | 9/29/14            | 0.03                   |                        | Lab-8         |
| Lot 3               | Titan Biotech   | M7I6KN01                 | 7             | 10/06/14           | 0.06                   |                        | Lab-8         |
| Lot 3               | Titan Biotech   | M7I6KN01                 | 8             | 10/14/14           | 0.06                   |                        | Lab-8         |
| Lot 3               | Titan Biotech   | M7I6KN01                 | 9             | 10/14/14           | 0.06                   |                        | Lab-8         |
| Lot 3               | Titan Biotech   | M7I6KN01                 | 10            | 10/20/14           | 0.06                   |                        | Lab-8         |

**Table S3.** 7H9 broth microdilution raw data from all laboratories for bedaquiline tested against the MTB H37Rv strain

DST, drug susceptibility test; BDQ, bedaquiline; MIC, minimal inhibitory concentration; INH, isoniazid

| Media Lot No | Supplier      | Supplier's Lot No | DST No | Date of DST | BDQ MIC ( $\mu\text{g/mL}$ ) | INH MIC ( $\mu\text{g/mL}$ ) | Day Read | Lab ID |
|--------------|---------------|-------------------|--------|-------------|------------------------------|------------------------------|----------|--------|
| Lot 1        | Thermo Fisher | 14181             | 1      | 7/1/2014    | 0.06                         | 0.06                         | 7        | Lab-1  |
| Lot 1        | Thermo Fisher | 14181             | 2      | 7/2/2014    | 0.25                         | 1                            | 7        | Lab-1  |
| Lot 1        | Thermo Fisher | 14181             | 3      | 7/7/2014    | 0.12                         | >1                           | 7        | Lab-1  |
| Lot 1        | Thermo Fisher | 14181             | 4      | 7/9/2014    | 0.03                         | 0.06                         | 7        | Lab-1  |
| Lot 1        | Thermo Fisher | 14181             | 5      | 7/14/2014   | 0.016                        | 0.06                         | 7        | Lab-1  |
| Lot 1        | Thermo Fisher | 14181             | 6      | 7/16/2014   | 0.03                         | 0.5                          | 7        | Lab-1  |
| Lot 1        | Thermo Fisher | 14181             | 7      | 7/17/2014   | 0.5                          | 1                            | 7        | Lab-1  |
| Lot 1        | Thermo Fisher | 14181             | 8      | 7/23/2014   | 0.03                         | 0.12                         | 7        | Lab-1  |
| Lot 1        | Thermo Fisher | 14181             | 9      | 7/24/2014   | 0.03                         | 0.25                         | 7        | Lab-1  |
| Lot 1        | Thermo Fisher | 14181             | 10     | 7/25/2014   | 0.25                         | 0.12                         | 7        | Lab-1  |
| Lot 1        | Thermo Fisher | 14181             | 11     | 7/29/2014   | 0.016                        | 0.5                          | 7        | Lab-1  |
| Lot 1        | Thermo Fisher | 14181             | 12     | 7/30/2014   | 0.03                         | 0.12                         | 7        | Lab-1  |
| Lot 2        | Thermo Fisher | 14202             | 1      | 7/1/2014    | 0.016                        | 0.06                         | 7        | Lab-1  |
| Lot 2        | Thermo Fisher | 14202             | 2      | 7/2/2014    | 0.06                         | 0.25                         | 7        | Lab-1  |
| Lot 2        | Thermo Fisher | 14202             | 3      | 7/7/2014    | 0.12                         | 0.06                         | 7        | Lab-1  |
| Lot 2        | Thermo Fisher | 14202             | 4      | 7/9/2014    | 0.016                        | 0.12                         | 7        | Lab-1  |
| Lot 2        | Thermo Fisher | 14202             | 5      | 7/14/2014   | 0.016                        | 0.25                         | 7        | Lab-1  |

| <b>Media Lot No</b> | <b>Supplier</b> | <b>Supplier's Lot No</b> | <b>DST No</b> | <b>Date of DST</b> | <b>BDQ MIC (µg/mL)</b> | <b>INH MIC (µg/mL)</b> | <b>Day Read</b> | <b>Lab ID</b> |
|---------------------|-----------------|--------------------------|---------------|--------------------|------------------------|------------------------|-----------------|---------------|
| Lot 2               | Thermo Fisher   | 14202                    | 6             | 7/16/2014          | 0.03                   | 0.12                   | 7               | Lab-1         |
| Lot 2               | Thermo Fisher   | 14202                    | 7             | 7/17/2014          | 0.016                  | 0.06                   | 7               | Lab-1         |
| Lot 2               | Thermo Fisher   | 14202                    | 8             | 7/23/2014          | 0.03                   | 0.5                    | 7               | Lab-1         |
| Lot 2               | Thermo Fisher   | 14202                    | 9             | 7/24/2014          | 0.016                  | 0.06                   | 7               | Lab-1         |
| Lot 2               | Thermo Fisher   | 14202                    | 10            | 7/25/2014          | 0.25                   | 0.5                    | 7               | Lab-1         |
| Lot 2               | Thermo Fisher   | 14202                    | 11            | 7/29/2014          | 0.12                   | 0.12                   | 7               | Lab-1         |
| Lot 2               | Thermo Fisher   | 14202                    | 12            | 7/30/2014          | 0.016                  | 0.5                    | 7               | Lab-1         |
| Lot 3               | Thermo Fisher   | 14203                    | 1             | 7/1/2014           | 0.016                  | 0.5                    | 7               | Lab-1         |
| Lot 3               | Thermo Fisher   | 14203                    | 2             | 7/2/2014           | 0.06                   | 0.5                    | 7               | Lab-1         |
| Lot 3               | Thermo Fisher   | 14203                    | 3             | 7/7/2014           | 0.016                  | 0.5                    | 7               | Lab-1         |
| Lot 3               | Thermo Fisher   | 14203                    | 4             | 7/9/2014           | 0.12                   | 0.5                    | 7               | Lab-1         |
| Lot 3               | Thermo Fisher   | 14203                    | 5             | 7/14/2014          | 0.016                  | 0.5                    | 7               | Lab-1         |
| Lot 3               | Thermo Fisher   | 14203                    | 6             | 7/16/2014          | 0.016                  | 0.5                    | 7               | Lab-1         |
| Lot 3               | Thermo Fisher   | 14203                    | 7             | 7/17/2014          | 0.016                  | 0.5                    | 7               | Lab-1         |
| Lot 3               | Thermo Fisher   | 14203                    | 8             | 7/23/2014          | 0.03                   | 0.5                    | 7               | Lab-1         |
| Lot 3               | Thermo Fisher   | 14203                    | 9             | 7/24/2014          | 0.06                   | 0.5                    | 7               | Lab-1         |
| Lot 3               | Thermo Fisher   | 14203                    | 10            | 7/25/2014          | 0.03                   | 0.5                    | 7               | Lab-1         |
| Lot 3               | Thermo Fisher   | 14203                    | 11            | 7/29/2014          | 0.016                  | 0.5                    | 7               | Lab-1         |
| Lot 3               | Thermo Fisher   | 14203                    | 12            | 7/30/2014          | 0.016                  | 0.5                    | 7               | Lab-1         |



| Media Lot No | Supplier      | Supplier's Lot No | DST No | Date of DST | BDQ MIC (µg/mL) | INH MIC (µg/mL) | Day Read | Lab ID |
|--------------|---------------|-------------------|--------|-------------|-----------------|-----------------|----------|--------|
| Lot 1        | Thermo Fisher | 14181             | 1      | 8/5/2014    | 0.03            | 0.06            | 10       | Lab-2  |
| Lot 1        | Thermo Fisher | 14181             | 2      | 8/5/2014    | 0.03            | 0.06            | 10       | Lab-2  |
| Lot 1        | Thermo Fisher | 14181             | 3      | 8/5/2014    | 0.03            | 0.06            | 10       | Lab-2  |
| Lot 1        | Thermo Fisher | 14181             | 4      | 8/5/2014    | 0.03            | 0.06            | 10       | Lab-2  |
| Lot 1        | Thermo Fisher | 14181             | 5      | 8/7/2014    | 0.03            | 0.06            | 10       | Lab-2  |
| Lot 1        | Thermo Fisher | 14181             | 6      | 8/7/2014    | 0.03            | 0.12            | 10       | Lab-2  |
| Lot 1        | Thermo Fisher | 14181             | 7      | 8/7/2014    | 0.03            | 0.12            | 10       | Lab-2  |
| Lot 1        | Thermo Fisher | 14181             | 8      | 8/18/2014   | 0.03            | 0.06            | 10       | Lab-2  |
| Lot 1        | Thermo Fisher | 14181             | 9      | 8/18/2014   | 0.03            | 0.06            | 10       | Lab-2  |
| Lot 1        | Thermo Fisher | 14181             | 10     | 8/18/2014   | 0.03            | 0.06            | 10       | Lab-2  |
| Lot 2        | Thermo Fisher | 14202             | 1      | 8/5/2014    | 0.016           | 0.12            | 10       | Lab-2  |
| Lot 2        | Thermo Fisher | 14202             | 2      | 8/5/2014    | 0.03            | 0.12            | 10       | Lab-2  |
| Lot 2        | Thermo Fisher | 14202             | 3      | 8/5/2014    | 0.016           | 0.12            | 10       | Lab-2  |
| Lot 2        | Thermo Fisher | 14202             | 4      | 8/5/2014    | 0.03            | 0.12            | 10       | Lab-2  |
| Lot 2        | Thermo Fisher | 14202             | 5      | 8/7/2014    | 0.03            | 0.25            | 10       | Lab-2  |
| Lot 2        | Thermo Fisher | 14202             | 6      | 8/7/2014    | 0.03            | 0.12            | 10       | Lab-2  |
| Lot 2        | Thermo Fisher | 14202             | 7      | 8/7/2014    | 0.03            | 0.12            | 10       | Lab-2  |
| Lot 2        | Thermo Fisher | 14202             | 8      | 8/18/2014   | 0.03            | 0.12            | 10       | Lab-2  |
| Lot 2        | Thermo Fisher | 14202             | 9      | 8/18/2014   | 0.03            | 0.12            | 10       | Lab-2  |

| Media Lot No | Supplier      | Supplier's Lot No | DST No | Date of DST | BDQ MIC (µg/mL) | INH MIC (µg/mL) | Day Read | Lab ID |
|--------------|---------------|-------------------|--------|-------------|-----------------|-----------------|----------|--------|
| Lot 2        | Thermo Fisher | 14202             | 10     | 8/18/2014   | 0.016           | 0.12            | 10       | Lab-2  |
| Lot 3        | Thermo Fisher | 14203             | 1      | 8/5/2014    | 0.03            | 1               | 10       | Lab-2  |
| Lot 3        | Thermo Fisher | 14203             | 2      | 8/5/2014    | 0.016           | 0.5             | 10       | Lab-2  |
| Lot 3        | Thermo Fisher | 14203             | 3      | 8/5/2014    | 0.016           | 1               | 10       | Lab-2  |
| Lot 3        | Thermo Fisher | 14203             | 4      | 8/5/2014    | 0.016           | 1               | 10       | Lab-2  |
| Lot 3        | Thermo Fisher | 14203             | 5      | 8/7/2014    | 0.03            | 0.5             | 10       | Lab-2  |
| Lot 3        | Thermo Fisher | 14203             | 6      | 8/7/2014    | 0.03            | 0.5             | 10       | Lab-2  |
| Lot 3        | Thermo Fisher | 14203             | 7      | 8/7/2014    | 0.03            | 1               | 10       | Lab-2  |
| Lot 3        | Thermo Fisher | 14203             | 8      | 8/18/2014   | 0.016           | 0.5             | 10       | Lab-2  |
| Lot 3        | Thermo Fisher | 14203             | 9      | 8/18/2014   | 0.016           | 0.5             | 10       | Lab-2  |
| Lot 3        | Thermo Fisher | 14203             | 10     | 8/18/2014   | 0.03            | 0.5             | 10       | Lab-2  |
| Lot 1        | Thermo Fisher | 14181             | 1      | 9/2/2014    | 0.03            | 0.06            | 10       | Lab-3  |
| Lot 1        | Thermo Fisher | 14181             | 2      | 9/2/2014    | 0.03            | 0.06            | 10       | Lab-3  |
| Lot 1        | Thermo Fisher | 14181             | 3      | 9/2/2014    | 0.03            | 0.06            | 10       | Lab-3  |
| Lot 1        | Thermo Fisher | 14181             | 4      | 9/2/2014    | 0.03            | 0.06            | 10       | Lab-3  |
| Lot 1        | Thermo Fisher | 14181             | 5      | 9/2/2014    | 0.03            | 0.06            | 10       | Lab-3  |
| Lot 1        | Thermo Fisher | 14181             | 6      | 9/2/2014    | 0.03            | 0.06            | 10       | Lab-3  |
| Lot 1        | Thermo Fisher | 14181             | 7      | 9/2/2014    | 0.03            | 0.06            | 10       | Lab-3  |
| Lot 1        | Thermo Fisher | 14181             | 8      | 9/2/2014    | 0.03            | 0.06            | 10       | Lab-3  |

| <b>Media Lot No</b> | <b>Supplier</b> | <b>Supplier's Lot No</b> | <b>DST No</b> | <b>Date of DST</b> | <b>BDQ MIC (µg/mL)</b> | <b>INH MIC (µg/mL)</b> | <b>Day Read</b> | <b>Lab ID</b> |
|---------------------|-----------------|--------------------------|---------------|--------------------|------------------------|------------------------|-----------------|---------------|
| Lot 1               | Thermo Fisher   | 14181                    | 9             | 9/2/2014           | 0.03                   | 0.06                   | 10              | Lab-3         |
| Lot 1               | Thermo Fisher   | 14181                    | 10            | 9/2/2014           | 0.03                   | 0.06                   | 10              | Lab-3         |
| Lot 2               | Thermo Fisher   | 14202                    | 1             | 9/4/2014           | 0.03                   | 0.12                   | 10              | Lab-3         |
| Lot 2               | Thermo Fisher   | 14202                    | 2             | 9/4/2014           | 0.016                  | 0.12                   | 10              | Lab-3         |
| Lot 2               | Thermo Fisher   | 14202                    | 3             | 9/4/2014           | 0.016                  | 0.12                   | 10              | Lab-3         |
| Lot 2               | Thermo Fisher   | 14202                    | 4             | 9/4/2014           | 0.016                  | 0.12                   | 10              | Lab-3         |
| Lot 2               | Thermo Fisher   | 14202                    | 5             | 9/4/2014           | 0.016                  | 0.12                   | 10              | Lab-3         |
| Lot 2               | Thermo Fisher   | 14202                    | 6             | 9/9/2014           | 0.03                   | 0.12                   | 10              | Lab-3         |
| Lot 2               | Thermo Fisher   | 14202                    | 7             | 9/9/2014           | 0.016                  | 0.12                   | 10              | Lab-3         |
| Lot 2               | Thermo Fisher   | 14202                    | 8             | 9/9/2014           | 0.016                  | 0.12                   | 10              | Lab-3         |
| Lot 2               | Thermo Fisher   | 14202                    | 9             | 9/9/2014           | 0.016                  | 0.12                   | 10              | Lab-3         |
| Lot 2               | Thermo Fisher   | 14202                    | 10            | 9/9/2014           | 0.016                  | 0.12                   | 10              | Lab-3         |
| Lot 3               | Thermo Fisher   | 14203                    | 1             | 9/4/2014           | 0.016                  | 0.12                   | 10              | Lab-3         |
| Lot 3               | Thermo Fisher   | 14203                    | 2             | 9/4/2014           | 0.03                   | 0.12                   | 10              | Lab-3         |
| Lot 3               | Thermo Fisher   | 14203                    | 3             | 9/4/2014           | 0.016                  | 0.12                   | 10              | Lab-3         |
| Lot 3               | Thermo Fisher   | 14203                    | 4             | 9/4/2014           | 0.016                  | 0.12                   | 10              | Lab-3         |
| Lot 3               | Thermo Fisher   | 14203                    | 5             | 9/4/2014           | 0.016                  | 0.12                   | 10              | Lab-3         |
| Lot 3               | Thermo Fisher   | 14203                    | 6             | 9/4/2014           | 0.016                  | 0.12                   | 10              | Lab-3         |
| Lot 3               | Thermo Fisher   | 14203                    | 7             | 9/4/2014           | 0.016                  | 0.12                   | 10              | Lab-3         |

| Media Lot No | Supplier      | Supplier's Lot No | DST No | Date of DST | BDQ MIC (µg/mL) | INH MIC (µg/mL) | Day Read | Lab ID |
|--------------|---------------|-------------------|--------|-------------|-----------------|-----------------|----------|--------|
| Lot 3        | Thermo Fisher | 14203             | 8      | 9/4/2014    | 0.016           | 0.12            | 10       | Lab-3  |
| Lot 3        | Thermo Fisher | 14203             | 9      | 9/4/2014    | 0.016           | 0.12            | 10       | Lab-3  |
| Lot 3        | Thermo Fisher | 14203             | 10     | 9/4/2014    | 0.016           | 0.12            | 10       | Lab-3  |
| Lot 1        | Thermo Fisher | 14181             | 1      | 8/29/2014   | 0.03            | <0.03           | 10       | Lab-4  |
| Lot 1        | Thermo Fisher | 14181             | 2      | 8/29/2014   | 0.06            | 0.06            | 10       | Lab-4  |
| Lot 1        | Thermo Fisher | 14181             | 3      | 8/29/2014   | 0.03            | <0.03           | 10       | Lab-4  |
| Lot 1        | Thermo Fisher | 14181             | 4      | 9/1/2014    | 0.03            | 0.06            | 10       | Lab-4  |
| Lot 1        | Thermo Fisher | 14181             | 5      | 9/1/2014    | NR              | NR              | 10       | Lab-4  |
| Lot 1        | Thermo Fisher | 14181             | 6      | 9/1/2014    | 0.06            | 0.06            | 10       | Lab-4  |
| Lot 1        | Thermo Fisher | 14181             | 7      | 9/5/2014    | 0.016           | 0.06            | 10       | Lab-4  |
| Lot 1        | Thermo Fisher | 14181             | 8      | 9/5/2014    | 0.06            | <0.03           | 10       | Lab-4  |
| Lot 1        | Thermo Fisher | 14181             | 9      | 9/5/2014    | 0.06            | 0.06            | 10       | Lab-4  |
| Lot 1        | Thermo Fisher | 14181             | 10     | 9/5/2014    | 0.06            | 0.06            | 10       | Lab-4  |
| Lot 2        | Thermo Fisher | 14202             | 1      | 8/29/2014   | 0.03            | 0.06            | 10       | Lab-4  |
| Lot 2        | Thermo Fisher | 14202             | 2      | 8/29/2014   | 0.03            | 0.06            | 10       | Lab-4  |
| Lot 2        | Thermo Fisher | 14202             | 3      | 8/29/2014   | 0.03            | 0.06            | 10       | Lab-4  |
| Lot 2        | Thermo Fisher | 14202             | 4      | 9/1/2014    | 0.03            | 0.06            | 10       | Lab-4  |
| Lot 2        | Thermo Fisher | 14202             | 5      | 9/1/2014    | 0.016           | 0.06            | 10       | Lab-4  |
| Lot 2        | Thermo Fisher | 14202             | 6      | 9/1/2014    | 0.016           | 0.06            | 10       | Lab-4  |

| Media Lot No | Supplier      | Supplier's Lot No | DST No | Date of DST | BDQ MIC (µg/mL) | INH MIC (µg/mL) | Day Read | Lab ID |
|--------------|---------------|-------------------|--------|-------------|-----------------|-----------------|----------|--------|
| Lot 2        | Thermo Fisher | 14202             | 7      | 9/5/2014    | 0.016           | 0.06            | 10       | Lab-4  |
| Lot 2        | Thermo Fisher | 14202             | 8      | 9/5/2014    | 0.016           | 0.06            | 10       | Lab-4  |
| Lot 2        | Thermo Fisher | 14202             | 9      | 9/5/2014    | 0.03            | 0.06            | 10       | Lab-4  |
| Lot 2        | Thermo Fisher | 14202             | 10     | 9/5/2014    | 0.03            | 0.06            | 10       | Lab-4  |
| Lot 3        | Thermo Fisher | 14203             | 1      | 8/29/2014   | 0.03            | 0.5             | 10       | Lab-4  |
| Lot 3        | Thermo Fisher | 14203             | 2      | 8/29/2014   | 0.016           | 0.5             | 10       | Lab-4  |
| Lot 3        | Thermo Fisher | 14203             | 3      | 8/29/2014   | 0.03            | 0.5             | 10       | Lab-4  |
| Lot 3        | Thermo Fisher | 14203             | 4      | 9/1/2014    | 0.016           | 0.5             | 10       | Lab-4  |
| Lot 3        | Thermo Fisher | 14203             | 5      | 9/1/2014    | 0.016           | 0.5             | 10       | Lab-4  |
| Lot 3        | Thermo Fisher | 14203             | 6      | 9/1/2014    | 0.03            | 0.5             | 10       | Lab-4  |
| Lot 3        | Thermo Fisher | 14203             | 7      | 9/5/2014    | 0.016           | 0.5             | 10       | Lab-4  |
| Lot 3        | Thermo Fisher | 14203             | 8      | 9/5/2014    | 0.03            | 0.5             | 10       | Lab-4  |
| Lot 3        | Thermo Fisher | 14203             | 9      | 9/5/2014    | 0.016           | 0.5             | 10       | Lab-4  |
| Lot 3        | Thermo Fisher | 14203             | 10     | 9/5/2014    | 0.03            | 0.5             | 10       | Lab-4  |
| Lot 1        | Thermo Fisher | 14181             | 1      | 8/20/2014   | 0.03            | 0.06            | 10       | Lab-5  |
| Lot 1        | Thermo Fisher | 14181             | 2      | 8/20/2014   | 0.03            | 0.25            | 10       | Lab-5  |
| Lot 1        | Thermo Fisher | 14181             | 3      | 8/20/2014   | 0.03            | 0.06            | 10       | Lab-5  |
| Lot 1        | Thermo Fisher | 14181             | 4      | 8/20/2014   | 0.03            | 0.12            | 10       | Lab-5  |
| Lot 1        | Thermo Fisher | 14181             | 5      | 8/20/2014   | 0.03            | 0.12            | 10       | Lab-5  |

| Media Lot No | Supplier      | Supplier's Lot No | DST No | Date of DST   | BDQ MIC (µg/mL) | INH MIC (µg/mL) | Day Read | Lab ID |
|--------------|---------------|-------------------|--------|---------------|-----------------|-----------------|----------|--------|
| Lot 1        | Thermo Fisher | 14181             | 6      | 8/20/201<br>4 | 0.03            | 0.06            | 10       | Lab-5  |
| Lot 1        | Thermo Fisher | 14181             | 7      | 8/20/201<br>4 | 0.03            | 0.06            | 10       | Lab-5  |
| Lot 1        | Thermo Fisher | 14181             | 8      | 8/20/201<br>4 | 0.016           | 0.06            | 10       | Lab-5  |
| Lot 1        | Thermo Fisher | 14181             | 9      | 8/20/201<br>4 | 0.03            | 0.06            | 10       | Lab-5  |
| Lot 1        | Thermo Fisher | 14181             | 10     | 8/20/201<br>4 | 0.03            | 0.06            | 10       | Lab-5  |
| Lot 2        | Thermo Fisher | 14202             | 1      | 8/22/201<br>4 | 0.016           | 0.06            | 10       | Lab-5  |
| Lot 2        | Thermo Fisher | 14202             | 2      | 8/22/201<br>4 | 0.008           | 0.06            | 10       | Lab-5  |
| Lot 2        | Thermo Fisher | 14202             | 3      | 8/22/201<br>4 | 0.016           | 0.06            | 10       | Lab-5  |
| Lot 2        | Thermo Fisher | 14202             | 4      | 8/22/201<br>4 | 0.016           | 0.12            | 10       | Lab-5  |
| Lot 2        | Thermo Fisher | 14202             | 5      | 8/22/201<br>4 | 0.016           | 0.06            | 10       | Lab-5  |
| Lot 2        | Thermo Fisher | 14202             | 6      | 8/22/201<br>4 | 0.03            | 0.12            | 10       | Lab-5  |
| Lot 2        | Thermo Fisher | 14202             | 7      | 8/22/201<br>4 | 0.016           | 0.12            | 10       | Lab-5  |
| Lot 2        | Thermo Fisher | 14202             | 8      | 8/22/201<br>4 | 0.016           | 0.12            | 10       | Lab-5  |
| Lot 2        | Thermo Fisher | 14202             | 9      | 8/22/201<br>4 | 0.016           | 0.12            | 10       | Lab-5  |
| Lot 2        | Thermo Fisher | 14202             | 10     | 8/22/201<br>4 | 0.016           | 0.12            | 10       | Lab-5  |
| Lot 3        | Thermo Fisher | 14203             | 1      | 8/22/201<br>4 | 0.016           | 0.5             | 10       | Lab-5  |
| Lot 3        | Thermo Fisher | 14203             | 2      | 8/22/201<br>4 | 0.008           | 0.5             | 10       | Lab-5  |
| Lot 3        | Thermo Fisher | 14203             | 3      | 8/22/201<br>4 | 0.016           | 0.5             | 10       | Lab-5  |
| Lot 3        | Thermo Fisher | 14203             | 4      | 8/22/201<br>4 | 0.016           | 0.5             | 10       | Lab-5  |

| Media Lot No | Supplier      | Supplier's Lot No | DST No | Date of DST | BDQ MIC (µg/mL) | INH MIC (µg/mL) | Day Read | Lab ID |
|--------------|---------------|-------------------|--------|-------------|-----------------|-----------------|----------|--------|
| Lot 3        | Thermo Fisher | 14203             | 5      | 8/22/2014   | 0.016           | 0.5             | 10       | Lab-5  |
| Lot 3        | Thermo Fisher | 14203             | 6      | 8/22/2014   | 0.03            | 0.5             | 10       | Lab-5  |
| Lot 3        | Thermo Fisher | 14203             | 7      | 8/22/2014   | 0.016           | 0.5             | 10       | Lab-5  |
| Lot 3        | Thermo Fisher | 14203             | 8      | 8/22/2014   | 0.016           | 0.5             | 10       | Lab-5  |
| Lot 3        | Thermo Fisher | 14203             | 9      | 8/22/2014   | 0.016           | 0.5             | 10       | Lab-5  |
| Lot 3        | Thermo Fisher | 14203             | 10     | 8/22/2014   | 0.016           | 0.5             | 10       | Lab-5  |
| Lot 1        | Thermo Fisher | 14181             | 1      | 9/26/2014   | 0.016           | 0.06            | 10       | Lab-6  |
| Lot 1        | Thermo Fisher | 14181             | 2      | 9/26/2014   | 0.016           | 0.06            | 10       | Lab-6  |
| Lot 1        | Thermo Fisher | 14181             | 3      | 9/26/2014   | 0.016           | 0.06            | 10       | Lab-6  |
| Lot 1        | Thermo Fisher | 14181             | 4      | 9/26/2014   | 0.016           | ≤ 0.03          | 10       | Lab-6  |
| Lot 1        | Thermo Fisher | 14181             | 5      | 9/26/2014   | 0.016           | 0.06            | 10       | Lab-6  |
| Lot 1        | Thermo Fisher | 14181             | 6      | 9/26/2014   | 0.06            | 0.06            | 10       | Lab-6  |
| Lot 1        | Thermo Fisher | 14181             | 7      | 9/26/2014   | 0.016           | ≤ 0.03          | 10       | Lab-6  |
| Lot 1        | Thermo Fisher | 14181             | 8      | 9/26/2014   | 0.03            | 0.06            | 10       | Lab-6  |
| Lot 1        | Thermo Fisher | 14181             | 9      | 9/26/2014   | 0.03            | 0.06            | 10       | Lab-6  |
| Lot 1        | Thermo Fisher | 14181             | 10     | 9/26/2014   | 0.03            | 0.06            | 10       | Lab-6  |
| Lot 2        | Thermo Fisher | 14202             | 1      | 9/22/2014   | 0.03            | 0.06            | 10       | Lab-6  |
| Lot 2        | Thermo Fisher | 14202             | 2      | 9/22/2014   | 0.03            | 0.06            | 10       | Lab-6  |
| Lot 2        | Thermo Fisher | 14202             | 3      | 9/22/2014   | 0.03            | 0.06            | 10       | Lab-6  |

| Media Lot No | Supplier      | Supplier's Lot No | DST No | Date of DST   | BDQ MIC (µg/mL) | INH MIC (µg/mL) | Day Read | Lab ID |
|--------------|---------------|-------------------|--------|---------------|-----------------|-----------------|----------|--------|
| Lot 2        | Thermo Fisher | 14202             | 4      | 9/22/201<br>4 | 0.016           | 0.06            | 10       | Lab-6  |
| Lot 2        | Thermo Fisher | 14202             | 5      | 9/22/201<br>4 | 0.03            | 0.06            | 10       | Lab-6  |
| Lot 2        | Thermo Fisher | 14202             | 6      | 9/22/201<br>4 | 0.06            | 0.12            | 10       | Lab-6  |
| Lot 2        | Thermo Fisher | 14202             | 7      | 9/22/201<br>4 | 0.06            | 0.12            | 10       | Lab-6  |
| Lot 2        | Thermo Fisher | 14202             | 8      | 9/22/201<br>4 | 0.03            | 0.12            | 10       | Lab-6  |
| Lot 2        | Thermo Fisher | 14202             | 9      | 9/22/201<br>4 | 0.06            | 0.06            | 10       | Lab-6  |
| Lot 2        | Thermo Fisher | 14202             | 10     | 9/22/201<br>4 | 0.06            | 0.06            | 10       | Lab-6  |
| Lot 3        | Thermo Fisher | 14203             | 1      | 9/29/201<br>4 | 0.03            | 0.5             | 10       | Lab-6  |
| Lot 3        | Thermo Fisher | 14203             | 2      | 9/29/201<br>4 | 0.016           | 0.5             | 10       | Lab-6  |
| Lot 3        | Thermo Fisher | 14203             | 3      | 9/29/201<br>4 | 0.03            | 0.5             | 10       | Lab-6  |
| Lot 3        | Thermo Fisher | 14203             | 4      | 9/29/201<br>4 | 0.03            | 0.5             | 10       | Lab-6  |
| Lot 3        | Thermo Fisher | 14203             | 5      | 9/29/201<br>4 | 0.03            | 0.5             | 10       | Lab-6  |
| Lot 3        | Thermo Fisher | 14203             | 6      | 9/29/201<br>4 | 0.016           | 0.5             | 10       | Lab-6  |
| Lot 3        | Thermo Fisher | 14203             | 7      | 9/29/201<br>4 | 0.016           | 0.5             | 10       | Lab-6  |
| Lot 3        | Thermo Fisher | 14203             | 8      | 9/29/201<br>4 | 0.03            | 0.5             | 10       | Lab-6  |
| Lot 3        | Thermo Fisher | 14203             | 9      | 9/29/201<br>4 | 0.016           | 0.5             | 10       | Lab-6  |
| Lot 3        | Thermo Fisher | 14203             | 10     | 9/29/201<br>4 | NR              | 0.5             | 10       | Lab-6  |
| Lot 1        | Thermo Fisher | 14181             | 1      | 9/29/201<br>4 | 0.06            | 0.12            | 10       | Lab-7  |
| Lot 1        | Thermo Fisher | 14181             | 2      | 9/29/201<br>4 | 0.06            | 0.03            | 10       | Lab-7  |



| Media Lot No | Supplier      | Supplier's Lot No | DST No | Date of DST | BDQ MIC (µg/mL) | INH MIC (µg/mL) | Day Read | Lab ID |
|--------------|---------------|-------------------|--------|-------------|-----------------|-----------------|----------|--------|
| Lot 1        | Thermo Fisher | 14181             | 3      | 9/29/2014   | 0.06            | 0.03            | 10       | Lab-7  |
| Lot 1        | Thermo Fisher | 14181             | 4      | 9/29/2014   | 0.06            | 0.06            | 10       | Lab-7  |
| Lot 1        | Thermo Fisher | 14181             | 5      | 9/29/2014   | 0.06            | 0.06            | 10       | Lab-7  |
| Lot 1        | Thermo Fisher | 14181             | 6      | 9/30/2014   | 0.06            | 0.06            | 10       | Lab-7  |
| Lot 1        | Thermo Fisher | 14181             | 7      | 9/30/2014   | 0.06            | 0.06            | 10       | Lab-7  |
| Lot 1        | Thermo Fisher | 14181             | 8      | 9/30/2014   | 0.06            | 0.06            | 10       | Lab-7  |
| Lot 1        | Thermo Fisher | 14181             | 9      | 9/30/2014   | 0.06            | 0.03            | 10       | Lab-7  |
| Lot 1        | Thermo Fisher | 14181             | 10     | 9/30/2014   | 0.03            | 0.06            | 10       | Lab-7  |
| Lot 2        | Thermo Fisher | 14202             | 1      | 9/29/2014   | 0.06            | 0.06            | 10       | Lab-7  |
| Lot 2        | Thermo Fisher | 14202             | 2      | 9/29/2014   | 0.06            | 0.12            | 10       | Lab-7  |
| Lot 2        | Thermo Fisher | 14202             | 3      | 9/29/2014   | 0.06            | 0.06            | 10       | Lab-7  |
| Lot 2        | Thermo Fisher | 14202             | 4      | 9/29/2014   | 0.03            | 0.06            | 10       | Lab-7  |
| Lot 2        | Thermo Fisher | 14202             | 5      | 9/29/2014   | 0.03            | 0.06            | 10       | Lab-7  |
| Lot 2        | Thermo Fisher | 14202             | 6      | 9/30/2014   | 0.06            | 0.06            | 10       | Lab-7  |
| Lot 2        | Thermo Fisher | 14202             | 7      | 9/30/2014   | 0.06            | 0.06            | 10       | Lab-7  |
| Lot 2        | Thermo Fisher | 14202             | 8      | 9/30/2014   | 0.06            | 0.06            | 10       | Lab-7  |
| Lot 2        | Thermo Fisher | 14202             | 9      | 9/30/2014   | 0.03            | 0.06            | 10       | Lab-7  |
| Lot 2        | Thermo Fisher | 14202             | 10     | 9/30/2014   | 0.03            | 0.06            | 10       | Lab-7  |
| Lot 3        | Thermo Fisher | 14203             | 1      | 9/29/2014   | 0.03            | 0.25            | 10       | Lab-7  |

| Media Lot No | Supplier      | Supplier's Lot No | DST No | Date of DST | BDQ MIC (µg/mL) | INH MIC (µg/mL) | Day Read | Lab ID |
|--------------|---------------|-------------------|--------|-------------|-----------------|-----------------|----------|--------|
| Lot 3        | Thermo Fisher | 14203             | 2      | 9/29/2014   | 0.03            | 0.12            | 10       | Lab-7  |
| Lot 3        | Thermo Fisher | 14203             | 3      | 9/29/2014   | 0.06            | 0.12            | 10       | Lab-7  |
| Lot 3        | Thermo Fisher | 14203             | 4      | 9/29/2014   | 0.03            | 0.25            | 10       | Lab-7  |
| Lot 3        | Thermo Fisher | 14203             | 5      | 9/29/2014   | 0.06            | 0.25            | 10       | Lab-7  |
| Lot 3        | Thermo Fisher | 14203             | 6      | 9/30/2014   | 0.06            | 0.25            | 10       | Lab-7  |
| Lot 3        | Thermo Fisher | 14203             | 7      | 9/30/2014   | 0.03            | 0.06            | 10       | Lab-7  |
| Lot 3        | Thermo Fisher | 14203             | 8      | 9/30/2014   | 0.06            | 0.12            | 10       | Lab-7  |
| Lot 3        | Thermo Fisher | 14203             | 9      | 9/30/2014   | 0.06            | 0.25            | 10       | Lab-7  |
| Lot 3        | Thermo Fisher | 14203             | 10     | 9/30/2014   | 0.03            | 0.25            | 10       | Lab-7  |
| Lot 1        | Thermo Fisher | 14181             | 1      | 8/13/2014   | 0.016           | 0.06            | 14       | Lab-8  |
| Lot 1        | Thermo Fisher | 14181             | 2      | 8/20/2014   | 0.03            | 0.06            | 14       | Lab-8  |
| Lot 1        | Thermo Fisher | 14181             | 3      | 8/27/2014   | 0.03            | 0.06            | 14       | Lab-8  |
| Lot 1        | Thermo Fisher | 14181             | 4      | 9/3/2014    | 0.016           | 0.06            | 14       | Lab-8  |
| Lot 1        | Thermo Fisher | 14181             | 5      | 9/4/2014    | 0.03            | 0.12            | 14       | Lab-8  |
| Lot 1        | Thermo Fisher | 14181             | 6      | 9/11/2014   | 0.03            | 0.06            | 14       | Lab-8  |
| Lot 1        | Thermo Fisher | 14181             | 7      | 9/15/2014   | 0.03            | 0.06            | 14       | Lab-8  |
| Lot 1        | Thermo Fisher | 14181             | 8      | 9/24/2014   | 0.016           | 0.06            | 14       | Lab-8  |
| Lot 1        | Thermo Fisher | 14181             | 9      | 10/2/2014   | 0.03            | 0.06            | 14       | Lab-8  |
| Lot 1        | Thermo Fisher | 14181             | 10     | 10/9/2014   | 0.03            | 0.06            | 14       | Lab-8  |

| Media Lot No | Supplier      | Supplier's Lot No | DST No | Date of DST | BDQ MIC (µg/mL) | INH MIC (µg/mL) | Day Read | Lab ID |
|--------------|---------------|-------------------|--------|-------------|-----------------|-----------------|----------|--------|
| Lot 1        | Thermo Fisher | 14181             | 11     | 10/12/2014  | 0.016           | 0.5             | 14       | Lab-8  |
| Lot 2        | Thermo Fisher | 14202             | 1      | 8/13/2014   | 0.03            | 0.12            | 14       | Lab-8  |
| Lot 2        | Thermo Fisher | 14202             | 2      | 8/20/2014   | <0.008          | 0.06            | 14       | Lab-8  |
| Lot 2        | Thermo Fisher | 14202             | 3      | 8/27/2014   | 0.016           | 0.12            | 14       | Lab-8  |
| Lot 2        | Thermo Fisher | 14202             | 4      | 9/3/2014    | 0.016           | 0.12            | 14       | Lab-8  |
| Lot 2        | Thermo Fisher | 14202             | 5      | 9/4/2014    | 0.016           | 0.12            | 14       | Lab-8  |
| Lot 2        | Thermo Fisher | 14202             | 6      | 9/11/2014   | 0.016           | 0.12            | 14       | Lab-8  |
| Lot 2        | Thermo Fisher | 14202             | 7      | 9/15/2014   | 0.016           | 0.12            | 14       | Lab-8  |
| Lot 2        | Thermo Fisher | 14202             | 8      | 9/24/2014   | 0.016           | 0.12            | 14       | Lab-8  |
| Lot 2        | Thermo Fisher | 14202             | 9      | 10/2/2014   | 0.016           | 0.12            | 14       | Lab-8  |
| Lot 2        | Thermo Fisher | 14202             | 10     | 10/9/2014   | 0.016           | 0.12            | 14       | Lab-8  |
| Lot 2        | Thermo Fisher | 14202             | 11     | 10/12/2014  | 0.016           | 1               | 14       | Lab-8  |
| Lot 3        | Thermo Fisher | 14203             | 1      | 8/13/2014   | 0.016           | 0.12            | 14       | Lab-8  |
| Lot 3        | Thermo Fisher | 14203             | 2      | 8/20/2014   | 0.016           | 0.12            | 14       | Lab-8  |
| Lot 3        | Thermo Fisher | 14203             | 3      | 8/27/2014   | 0.016           | 0.5             | 14       | Lab-8  |
| Lot 3        | Thermo Fisher | 14203             | 4      | 9/3/2014    | 0.016           | 0.5             | 14       | Lab-8  |
| Lot 3        | Thermo Fisher | 14203             | 5      | 9/4/2014    | 0.016           | 1               | 14       | Lab-8  |
| Lot 3        | Thermo Fisher | 14203             | 6      | 9/11/2014   | 0.016           | 1               | 14       | Lab-8  |
| Lot 3        | Thermo Fisher | 14203             | 7      | 9/15/2014   | 0.016           | 1               | 14       | Lab-8  |

| <b>Media Lot No</b> | <b>Supplier</b> | <b>Supplier's Lot No</b> | <b>DST No</b> | <b>Date of DST</b> | <b>BDQ MIC (µg/mL)</b> | <b>INH MIC (µg/mL)</b> | <b>Day Read</b> | <b>Lab ID</b> |
|---------------------|-----------------|--------------------------|---------------|--------------------|------------------------|------------------------|-----------------|---------------|
| Lot 3               | Thermo Fisher   | 14203                    | 8             | 9/24/2014          | 0.03                   | 1                      | 14              | Lab-8         |
| Lot 3               | Thermo Fisher   | 14203                    | 9             | 10/2/2014          | <0.008                 | 1                      | 14              | Lab-8         |
| Lot 3               | Thermo Fisher   | 14203                    | 10            | 10/9/2014          | 0.016                  | 1                      | 14              | Lab-8         |
| Lot 3               | Thermo Fisher   | 14203                    | 11            | 10/12/2014         | 0.03                   | 1                      | 14              | Lab-8         |

**Figure S1.** Comparison of bedaquiline MICs in different media against MTB H37Rv

(a) 7H10 agar versus 7H11 agar dilution excluding data from Lab-5 ( $n=212$ ). Pearson correlation coefficient (R-value) of 0.58550;  $P \leq 0.0001$ . Intermethod correlation ( $\pm 1$  dilution) of 93.9% essential agreement; (b) Bedaquiline 7H10 agar dilution versus 7H9 broth microdilution excluding data from Lab-5 and Lab-1 ( $n=178$ ). Pearson correlation coefficient (R-value) of  $-0.15700$ . Intermethod correlation ( $\pm 1$  dilution) of 72.5% essential agreement; (c) Bedaquiline 7H11 agar dilution versus 7H9 broth microdilution excluding data from Lab-5 and Lab-1 ( $n=177$ ). Pearson correlation coefficient (R-value) of  $-0.22055$ . Intermethod correlation ( $\pm 1$  dilution) of 74.6% essential agreement.

**Figure S1**

**(a)**

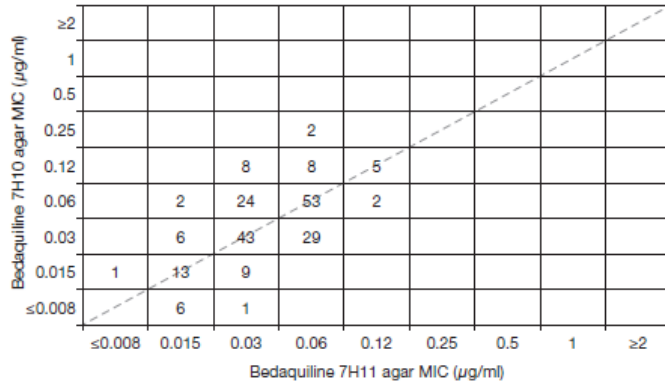

**(b)**

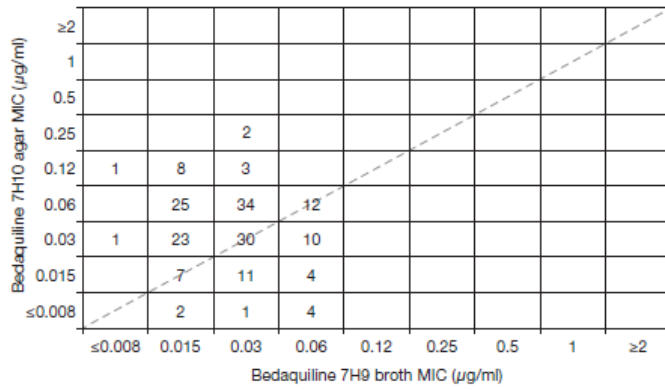

**(c)**

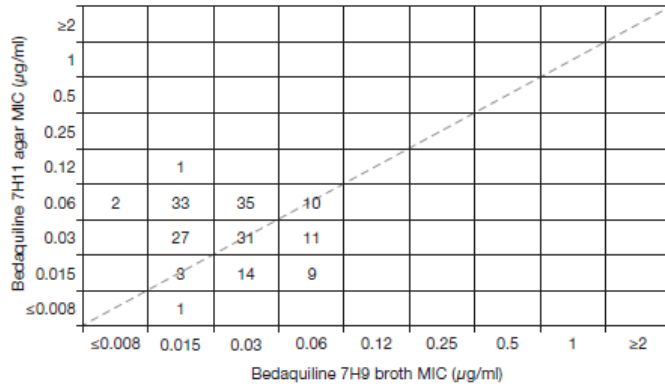

Supplement: JCM.01123-16_zjm999095231so1.pdf [file JCM.01123-16_zjm999095231so1.pdf]
